# Supplementary material for: Synthesis of Chalcone Derivatives: Inducing Apoptosis of HepG2 Cells via Regulating Reactive Oxygen Species and Mitochondrial Pathway
Source: PubMed Central journal article supplement (PMC6874057; doi:10.3389/fphar.2019.01341), 2019-11-15
Supplement: DataSheet_1.pdf [file DataSheet_1.pdf]

# **Synthesis of Chalcone Derivatives: Inducing Apoptosis of HepG2 Cells via Regulating ROS and Mitochondrial Pathway**

**Hongtian Zhu**<sup>1,3</sup>, **Lei Tang**<sup>1,3</sup>, **Chenghong Zhang**<sup>1,3</sup>, **Baochu Wei**<sup>1,2</sup>, **Pingrong Yang**<sup>1,4</sup>, **Dian He**<sup>1,4\*</sup>,  
**Lifang Zheng**<sup>1\*</sup>, **Yang Zhang**<sup>3,5\*</sup>

<sup>1</sup> Materia Medica Development Group, Institute of Medicinal Chemistry, Lanzhou University School of Pharmacy, Lanzhou 730000, China

<sup>2</sup> Lanzhou Pulmonary Hospital Pharmacy, Lanzhou 730046, China

<sup>3</sup> Lanzhou Weihuan Biological Science and Technology Development Co, Ltd. Lanzhou 730000, China

<sup>4</sup> Gansu Institute for Drug Control, Lanzhou 730070, China

<sup>5</sup> School of Pharmaceutical Sciences, Chongqing University, Chongqing 401331, China

\* Corresponding authors:

Hed@lzu.edu.cn (D. He);

zhangy2016@cqu.edu.cn (Y. Zhang);

zhenglf@lzu.edu.cn (L. Zheng)

## Contents

|                                                                      |    |
|----------------------------------------------------------------------|----|
| 1. Compounds spectrum analysis.....                                  | 2  |
| 2. <sup>1</sup> H-NMR information of the synthesized compounds.....  | 6  |
| 3. <sup>13</sup> C-NMR information of the synthesized compounds..... | 20 |
| 4. HRMS information of the synthesized compounds.....                | 34 |
| 5. The purity information of the synthesized compounds.....          | 41 |

## 1. Compounds spectrum analysis

### 1.1. (E)-5-(3-(4-fluorophenyl)acryloyl)-2-hydroxybenzamide (**a1**)

White solid, m.p. 222.2-222.7 °C. Yield 83%; <sup>1</sup>H NMR (400 MHz, DMSO-*d*<sub>6</sub>): δ 13.98 (s, 1H), 8.80 (s, 1H), 8.71 (s, 1H), 8.23 (d, *J* = 8.8 Hz, 2H), 7.99 (t, 2H), 7.94 (d, *J* = 15.5 Hz, 1H), 7.77 (d, *J* = 15.5 Hz, 1H), 7.36 (t, 2H), 7.07 (d, *J* = 8.6 Hz, 1H); <sup>13</sup>C NMR (100 MHz, DMSO-*d*<sub>6</sub>): δ 186.97, 172.28, 165.84, 162.43, 142.60, 134.82, 131.97, 131.52, 130.10, 128.98, 122.08, 118.64, 116.51, 116.29, 114.30; HRMS (ESI): found 286.0890 for [M+H]<sup>+</sup> (calcd. for C<sub>16</sub>H<sub>12</sub>FNO<sub>3</sub>, 285.0801). Purity: 99.0% (by HPLC).

### 1.2. (E)-5-(3-(3-chlorophenyl)acryloyl)-2-hydroxybenzamide (**a2**)

White solid, m.p. 212.3-212.8 °C. Yield 76%; <sup>1</sup>H NMR (400 MHz, DMSO-*d*<sub>6</sub>): δ 14.01 (s, 1H), 8.80 (s, 1H), 8.72 (s, 1H), 8.24 (d, *J* = 8.0 Hz, 2H), 8.07 (d, 2H), 7.83 (s, 1H), 7.74 (d, *J* = 15.6 Hz, 1H), 7.51 (t, 2H), 7.06 (d, *J* = 8.6 Hz, 1H); <sup>13</sup>C NMR (100 MHz, DMSO-*d*<sub>6</sub>): δ 186.67, 171.78, 165.52, 151.26, 142.13, 137.55, 134.91, 134.28, 131.08, 130.51, 130.17, 128.79, 128.23, 123.71, 118.67, 114.32; HRMS (ESI): found 324.0410 for [M+Na]<sup>+</sup> (calcd. for C<sub>16</sub>H<sub>12</sub>ClNO<sub>3</sub>, 301.0506). Purity: 91.4% (by HPLC).

### 1.3. (E)-5-(3-(3-bromophenyl)acryloyl)-2-hydroxybenzamide (**a3**)

Pink solid, m.p. 211.4-211.5 °C. Yield 68%; <sup>1</sup>H NMR (400 MHz, DMSO-*d*<sub>6</sub>): δ 13.99 (s, 1H), 8.79 (s, 1H), 8.71 (s, 1H), 8.25 (d, *J* = 8.8 Hz, 2H), 8.16 (s, 1H), 8.05 (d, *J* = 15.6 Hz, 1H), 7.87 (d, *J* = 8.0 Hz, 1H), 7.74 (d, *J* = 15.2 Hz, 1H), 7.66 (d, *J* = 8.0 Hz, 1H), 7.46 (t, 1H), 7.06 (d, *J* = 8.7 Hz, 1H); <sup>13</sup>C NMR (100 MHz, DMSO-*d*<sub>6</sub>): δ 190.71, 172.46, 170.94, 166.24, 144.33, 136.24, 134.54, 131.90, 130.87, 130.13, 127.02, 126.52, 123.24, 122.63, 117.84, 116.89; HRMS (ESI): found 369.9879 for [M+Na]<sup>+</sup> (calcd. for C<sub>16</sub>H<sub>12</sub>BrNO<sub>3</sub>, 345.0001). Purity: 95.1% (by HPLC).

### 1.4. (E)-5-(3-(4-bromophenyl)acryloyl)-2-hydroxybenzamide (**a4**)

Yellow solid, m.p. 226.9-227.5 °C. Yield 66%; <sup>1</sup>H NMR (400 MHz, DMSO-*d*<sub>6</sub>): δ 13.99 (s, 1H), 8.79 (s, 1H), 8.70 (s, 1H), 8.22 (d, *J* = 8.8 Hz, 2H), 8.01 (d, *J* = 15.6 Hz, 1H), 7.86 (d, *J* = 8.4 Hz, 2H), 7.73 (d, *J* = 15.8 Hz, 1H), 7.69 (d, *J* = 8.5 Hz, 2H), 7.06 (d, *J* = 8.7 Hz, 1H); <sup>13</sup>C NMR (100 MHz, DMSO-*d*<sub>6</sub>): δ 187.09, 172.33, 165.90, 142.48, 134.87, 134.59, 132.37, 131.11, 130.16, 128.90, 124.32, 122.97, 118.69, 114.32; HRMS (ESI): found 346.0056 for [M+H]<sup>+</sup> (calcd. for C<sub>16</sub>H<sub>12</sub>BrNO<sub>3</sub>, 345.0001). Purity: 94.2% (by HPLC).

### 1.5. (E)-5-cinnamoyl-2-hydroxybenzamide (**a5**)

Yellow solid, m.p. 182.7-184.5 °C. Yield 74%; <sup>1</sup>H NMR (400 MHz, DMSO-*d*<sub>6</sub>): δ 14.01 (s, 1H), 8.82 (s, 1H), 8.72 (s, 1H), 8.23 (d, *J* = 8.8 Hz, 2H), 8.00 (d, *J* = 15.5 Hz, 1H), 7.89 (m, 2H), 7.78 (d, *J* = 15.5 Hz, 1H), 7.50 (m, 3H), 7.08 (d, *J* = 8.7 Hz, 1H); <sup>13</sup>C NMR (100 MHz, DMSO-*d*<sub>6</sub>): δ 187.11, 172.06, 165.95, 135.29, 134.84, 130.99, 130.14, 129.31, 129.00, 122.19, 118.70, 118.19, 114.27; HRMS (ESI): found 268.0983 for [M+H]<sup>+</sup> (calcd. for C<sub>16</sub>H<sub>13</sub>NO<sub>3</sub>, 267.0895). Purity: 95.9% (by HPLC).

### 1.6. (E)-2-hydroxy-5-(3-(*o*-tolyl)acryloyl)benzamide (**a6**)

Yellow solid, m.p. 163.1-164.9 °C. Yield 68%; <sup>1</sup>H NMR (400 MHz, DMSO-*d*<sub>6</sub>): δ 14.02 (s, 1H), 8.83 (s, 1H), 8.72 (s, 1H), 8.21 (d, *J* = 9.0 Hz, 2H), 8.04 (d, *J* = 15.6 Hz, 1H), 7.99 (d, *J* = 8.2 Hz, 1H), 7.89 (d, *J* = 15.4 Hz, 1H), 7.41 – 7.23 (m, 3H), 7.07 (d, *J* = 8.7 Hz, 1H), 2.44 (d, *J* = 12.4 Hz, 3H); <sup>13</sup>C NMR (100 MHz, DMSO-*d*<sub>6</sub>): δ 187.14, 172.18, 165.86, 140.99, 138.39, 134.82, 133.97, 131.27, 130.64, 130.09, 129.00, 127.20, 126.69, 123.12, 118.76, 114.20, 38.70 – 38.06; HRMS (ESI): found 282.1193 for [M+H]<sup>+</sup> (calcd. for C<sub>17</sub>H<sub>15</sub>NO<sub>3</sub>, 281.1052). Purity: 99.1% (by HPLC).

*1.7. (E)-2-hydroxy-5-(3-(*m*-tolyl)acryloyl)benzamide (a7)*

White solid, m.p. 171.4-171.5 °C. Yield 62%; <sup>1</sup>H NMR (400 MHz, DMSO-*d*<sub>6</sub>): δ 14.00 (s, 1H), 8.83 (s, 1H), 8.71 (s, 1H), 8.20 (d, *J* = 8.9 Hz, 2H), 7.95 (d, *J* = 15.5 Hz, 1H), 7.72 (d, *J* = 15.5 Hz, 1H), 7.68 – 7.59 (m, 2H), 7.34 (t, *J* = 7.5 Hz, 1H), 7.25 (d, *J* = 7.4 Hz, 1H), 7.04 (d, *J* = 8.7 Hz, 1H), 2.36 (s, 3H); <sup>13</sup>C NMR (100 MHz, DMSO-*d*<sub>6</sub>): δ 187.16, 165.93, 143.90, 138.46, 135.22, 134.81, 131.69, 130.06, 129.55, 129.16, 128.90, 126.60, 121.89, 118.66, 114.24, 21.31; HRMS (ESI): found 282.1191 for [M+H]<sup>+</sup> (calcd. for C<sub>17</sub>H<sub>15</sub>NO<sub>3</sub>, 281.1052). Purity: 99.8% (by HPLC).

*1.8. (E)-2-hydroxy-5-(3-(*p*-tolyl)acryloyl)benzamide (a8)*

Yellow solid, m.p. 190.5-191.7 °C. Yield 71%; <sup>1</sup>H NMR (400 MHz, DMSO-*d*<sub>6</sub>): δ 13.63 (s, 1H), 8.77 (s, 1H), 8.69 (s, 1H), 8.32 – 8.02 (m, 2H), 8.01 (d, *J* = 15.5 Hz, 1H), 7.85 – 7.65 (m, 2H), 7.49 – 7.12 (m, 3H), 7.03 (d, *J* = 8.7 Hz, 1H), 2.33 (s, 3H); <sup>13</sup>C NMR (100 MHz, DMSO-*d*<sub>6</sub>): δ 187.05, 172.33, 165.94, 143.86, 140.93, 134.73, 132.51, 130.02, 129.10, 127.01, 121.01, 118.66, 114.15, 20.99; HRMS (ESI): found 282.1228 for [M+H]<sup>+</sup> (calcd. for C<sub>17</sub>H<sub>15</sub>NO<sub>3</sub>, 281.1052). Purity: 91.5% (by HPLC).

*1.9. (E)-2-hydroxy-5-(3-(2-methoxyphenyl)acryloyl)benzamide (a9)*

Yellow solid, m.p. 237.2-238.9 °C. Yield 71%; <sup>1</sup>H NMR (400 MHz, DMSO-*d*<sub>6</sub>): δ 13.97 (s, 1H), 8.81 (s, 1H), 8.70 (s, 1H), 8.20 (d, *J* = 8.8 Hz, 2H), 8.11 (d, *J* = 15.6 Hz, 1H), 7.99 (d, *J* = 7.6 Hz, 1H), 7.93 (d, *J* = 15.7 Hz, 1H), 7.47 (t, *J* = 7.3 Hz, 1H), 7.13 (d, *J* = 8.2 Hz, 1H), 7.09 – 7.05 (t, *J* = 7.7 Hz, 2H), 3.91 (s, 3H); <sup>13</sup>C NMR (100 MHz, DMSO-*d*<sub>6</sub>): δ 190.71, 170.94, 166.24, 157.37, 140.86, 134.54, 130.87, 130.57, 129.59, 127.84, 126.52, 121.88, 120.84, 117.84, 116.89, 113.50, 56.79; HRMS (ESI): found 298.1220 for [M+H]<sup>+</sup> (calcd. for C<sub>17</sub>H<sub>15</sub>NO<sub>4</sub>, 297.1001). Purity: 97.7% (by HPLC).

*1.10. (E)-2-hydroxy-5-(3-(3-methoxyphenyl)acryloyl)benzamide (a10)*

Yellow solid, m.p. 194.5-195.2 °C. Yield 77%; <sup>1</sup>H NMR (400 MHz, DMSO-*d*<sub>6</sub>): δ 13.98 (s, 1H), 8.80 (s, 1H), 8.71 (s, 1H), 8.23 (d, *J* = 8.7 Hz, 2H), 7.98 (d, *J* = 15.5 Hz, 1H), 7.74 (d, *J* = 15.5 Hz, 1H), 7.46 (s, 2H), 7.40 (t, *J* = 8.0 Hz, 1H), 7.06 (d, *J* = 8.7 Hz, 2H), 3.84 (s, 3H); <sup>13</sup>C NMR (100 MHz, DMSO-*d*<sub>6</sub>): δ 187.15, 172.20, 165.97, 160.04, 143.87, 136.49, 134.76, 130.27, 129.94, 128.83, 122.38, 121.68, 118.52, 116.50, 114.22, 55.60; HRMS (ESI): found 298.1179 for [M+H]<sup>+</sup> (calcd. for C<sub>17</sub>H<sub>15</sub>NO<sub>4</sub>, 297.1001). Purity: 98.9% (by HPLC).

*1.11. (E)-2-hydroxy-5-(3-(4-methoxyphenyl)acryloyl)benzamide (a11)*

Yellow solid, m.p. 212.8-212.8 °C. Yield 59%; <sup>1</sup>H NMR (400 MHz, DMSO-*d*<sub>6</sub>): δ 13.95 (s, 1H), 8.80 (s, 1H), 8.70 (s, 1H), 8.21 (d, *J* = 8.7 Hz, 2H), 7.93 – 7.81 (m, 3H), 7.74 (d, *J* = 15.4 Hz, 1H), 7.05 (d, *J* = 8.5 Hz, 3H), 3.84 (s, 3H); <sup>13</sup>C NMR (100 MHz, DMSO-*d*<sub>6</sub>): δ 187.04, 172.21, 165.90, 161.50,

143.73, 134.56, 131.02, 129.83, 129.16 – 128.96, 127.70, 119.32, 118.45, 114.58, 114.14, 55.85; HRMS (ESI): found 320.0902 for  $[M+Na]^+$  (calcd. for  $C_{17}H_{15}NO_4$ , 297.1001). Purity: 95.5% (by HPLC).

1.12. *(E)-5-(3-(2,4-dimethoxyphenyl)acryloyl)-2-hydroxybenzamide (a12)*

Yellow solid, m.p. 193.7-193.7 °C. Yield 76%;  $^1H$  NMR (400 MHz, DMSO-*d*6):  $\delta$  13.84 (s, 1H), 8.73 (s, 1H), 8.53 (s, 1H), 8.21 – 8.07 (m, 2H), 8.05 (d,  $J = 15.5$  Hz, 1H), 7.98 (m, 1H), 7.79 (d,  $J = 15.5$  Hz, 1H), 6.98 (d,  $J = 8.5$  Hz, 2H), 6.65 (s, 1H), 3.88 (d,  $J = 23.9$  Hz, 3H), 2.54 (s, 3H);  $^{13}C$  NMR (100 MHz, DMSO-*d*6):  $\delta$  196.13, 187.13, 171.72, 165.66, 163.27, 160.01, 138.00, 134.09, 130.19, 129.61, 128.25 – 128.05, 119.03, 118.50, 117.96, 114.30, 106.85, 98.70, 56.28, 55.88, 26.62; HRMS (ESI): found 328.1198 for  $[M+H]^+$  (calcd. for  $C_{18}H_{17}NO_5$ , 327.1107). Purity: 91.3% (by HPLC).

1.13. *(E)-5-(3-(3,4-dimethoxyphenyl)acryloyl)-2-hydroxybenzamide (a13)*

Yellow solid, m.p. 213.9-214.6 °C. Yield 85%;  $^1H$  NMR (400 MHz, DMSO-*d*6):  $\delta$  13.91 (s, 1H), 8.78 (s, 1H), 8.70 (s, 1H), 8.31 – 8.13 (m, 2H), 7.85 (d,  $J = 15.4$  Hz, 1H), 7.73 (d,  $J = 15.4$  Hz, 1H), 7.51 (s, 1H), 7.44 (d,  $J = 8.3$  Hz, 1H), 7.06 (d,  $J = 8.7$  Hz, 2H), 3.86 (d,  $J = 16.6$  Hz, 6H);  $^{13}C$  NMR (101 MHz, DMSO-*d*6):  $\delta$  187.22, 186.68, 172.24, 165.65, 151.78 – 151.54, 149.40, 144.56 – 144.18, 134.83 (s), 129.99, 129.32, 128.09, 123.83, 119.87, 118.42, 114.45, 112.11, 111.78, 56.14; HRMS (ESI): found 350.1010 for  $[M+Na]^+$  (calcd. for  $C_{18}H_{17}NO_5$ , 327.1107). Purity: 94.8% (by HPLC).

1.14. *(E)-2-hydroxy-5-(3-(3,4,5-trimethoxyphenyl)acryloyl)benzamide (a14)*

Yellow solid, m.p. 259.9-260.8 °C. Yield 82%;  $^1H$  NMR (400 MHz, DMSO-*d*6):  $\delta$  13.90 (s, 1H), 8.79 (s, 1H), 8.70 (s, 1H), 8.24 (d,  $J = 8.6$  Hz, 1H), 8.17 (s, 1H), 7.89 (d,  $J = 15.5$  Hz, 1H), 7.70 (d,  $J = 15.5$  Hz, 1H), 7.22 (s, 2H), 7.05 (d,  $J = 8.6$  Hz, 1H), 3.87 (s, 6H), 3.72 (s, 3H);  $^{13}C$  NMR (100 MHz, DMSO-*d*6):  $\delta$  187.36, 172.20, 165.75, 153.59, 144.35, 140.23, 134.93, 130.82, 130.17, 129.19, 121.59, 118.36, 114.62, 107.02, 60.63, 56.62; HRMS (ESI): found 358.1356 for  $[M+H]^+$  (calcd. for  $C_{19}H_{19}NO_6$ , 357.1212). Purity: 95.0% (by HPLC).

## 2. H-NMR information of the synthesized compounds

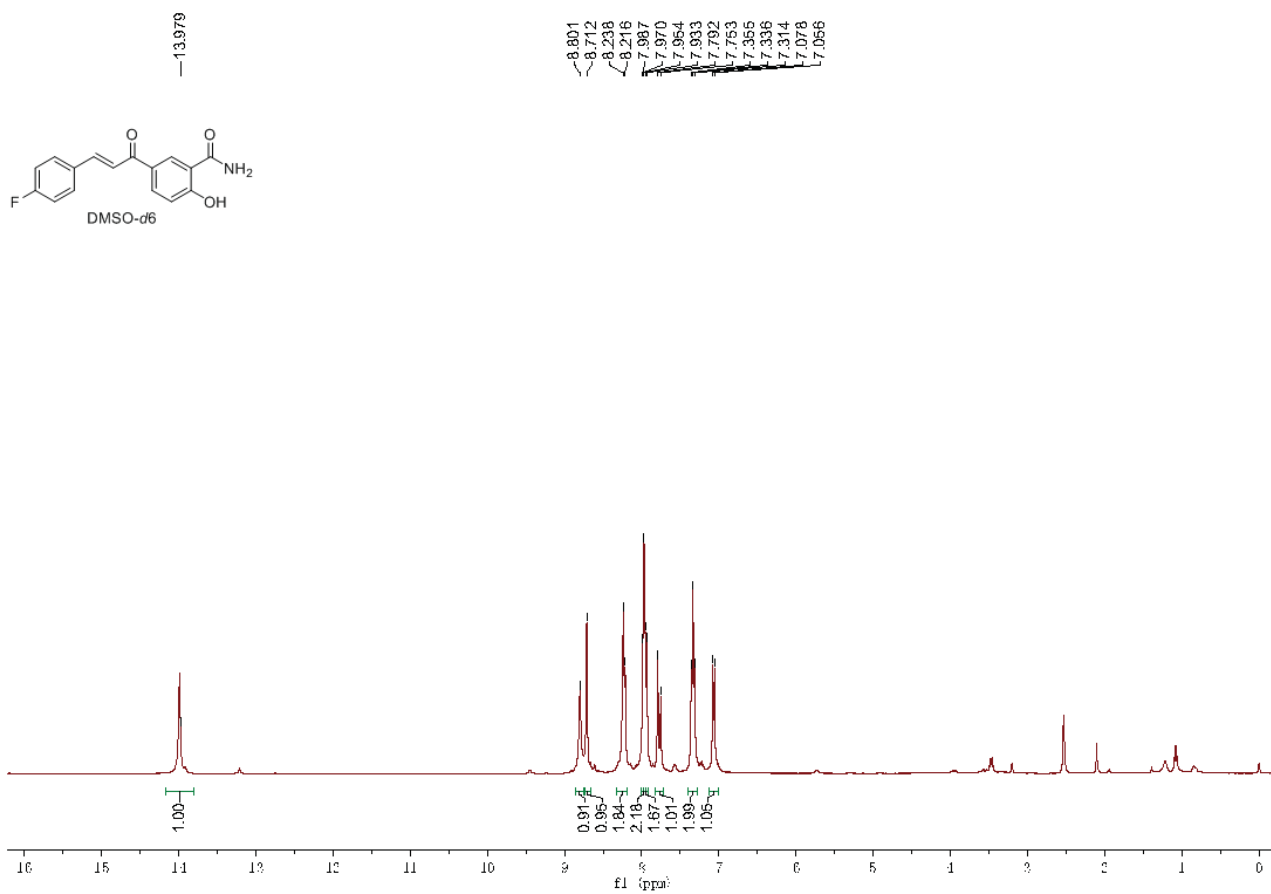

*(E)*-5-(3-(4-fluorophenyl)acryloyl)-2-hydroxybenzamide (**a1**)

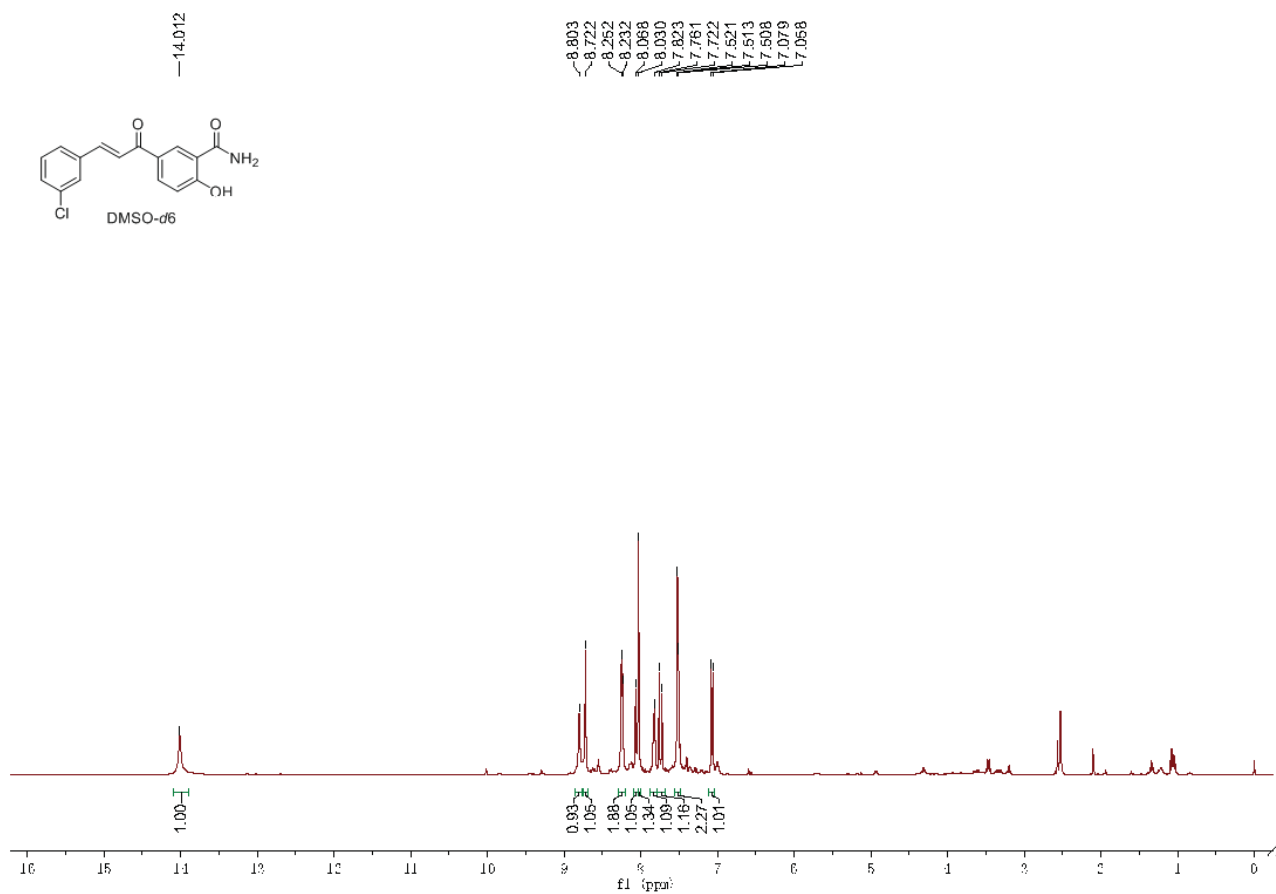

*(E)*-5-(3-(3-chlorophenyl)acryloyl)-2-hydroxybenzamide (**a2**)

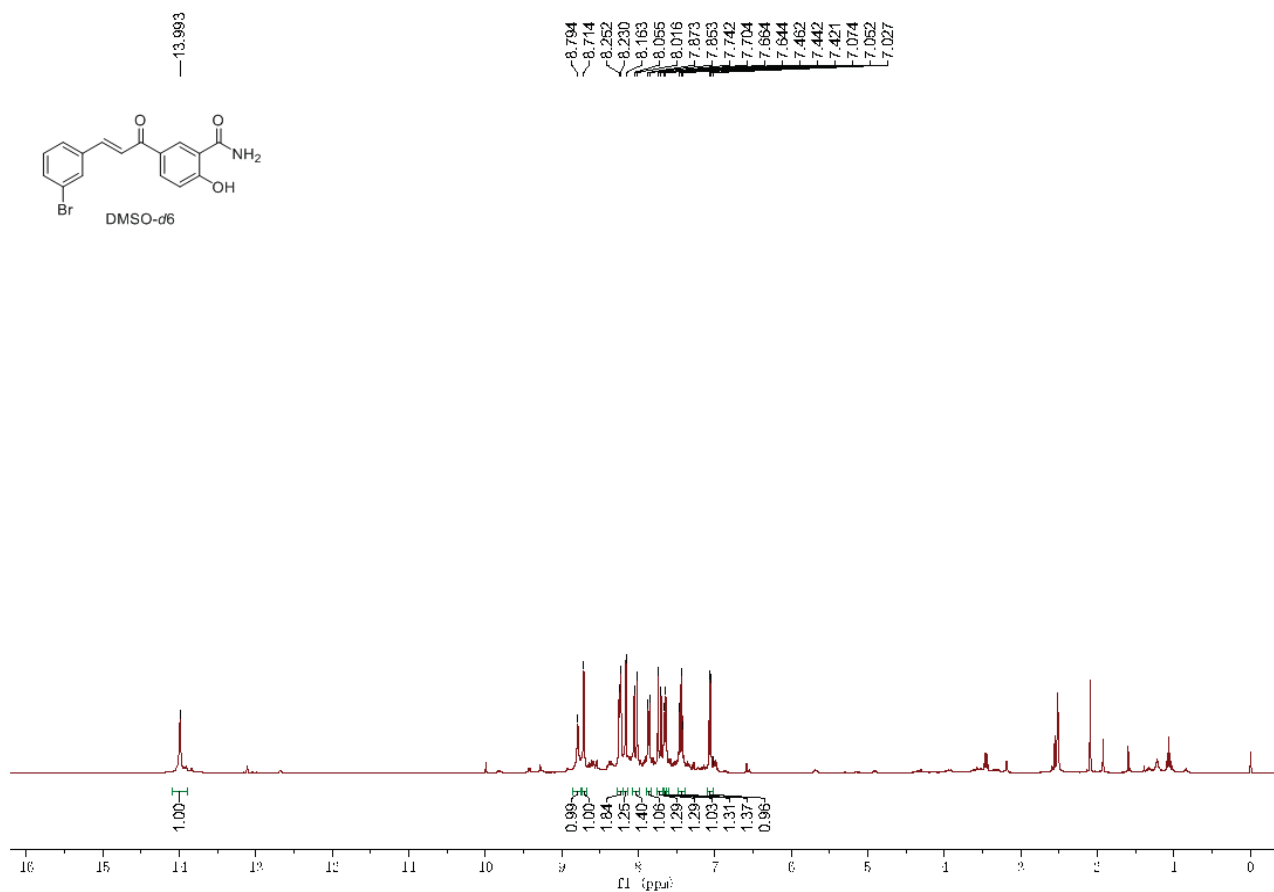

*(E)*-5-(3-(3-bromophenyl)acryloyl)-2-hydroxybenzamide (**a3**)



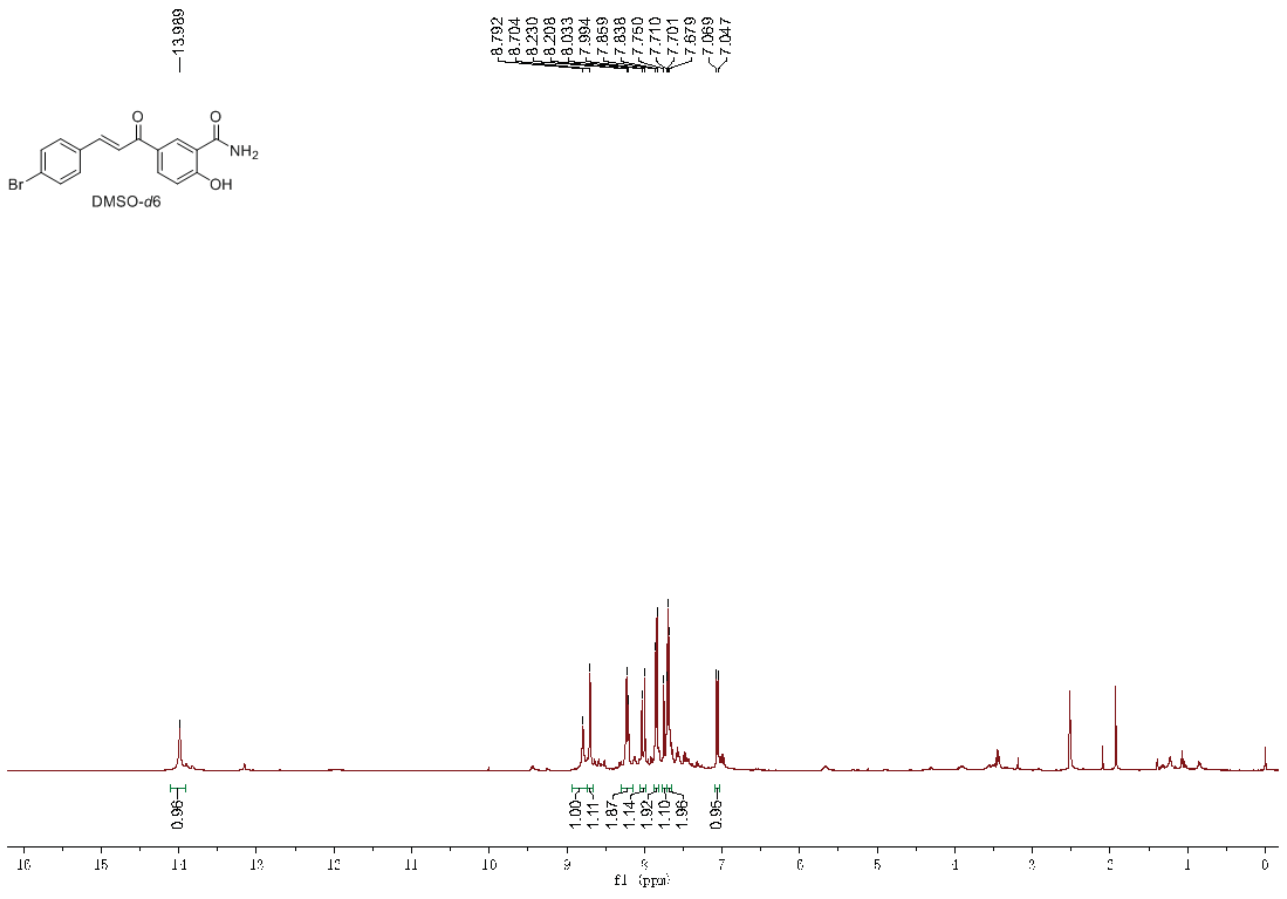

*(E)*-5-(3-(4-bromophenyl)acryloyl)-2-hydroxybenzamide (**a4**)

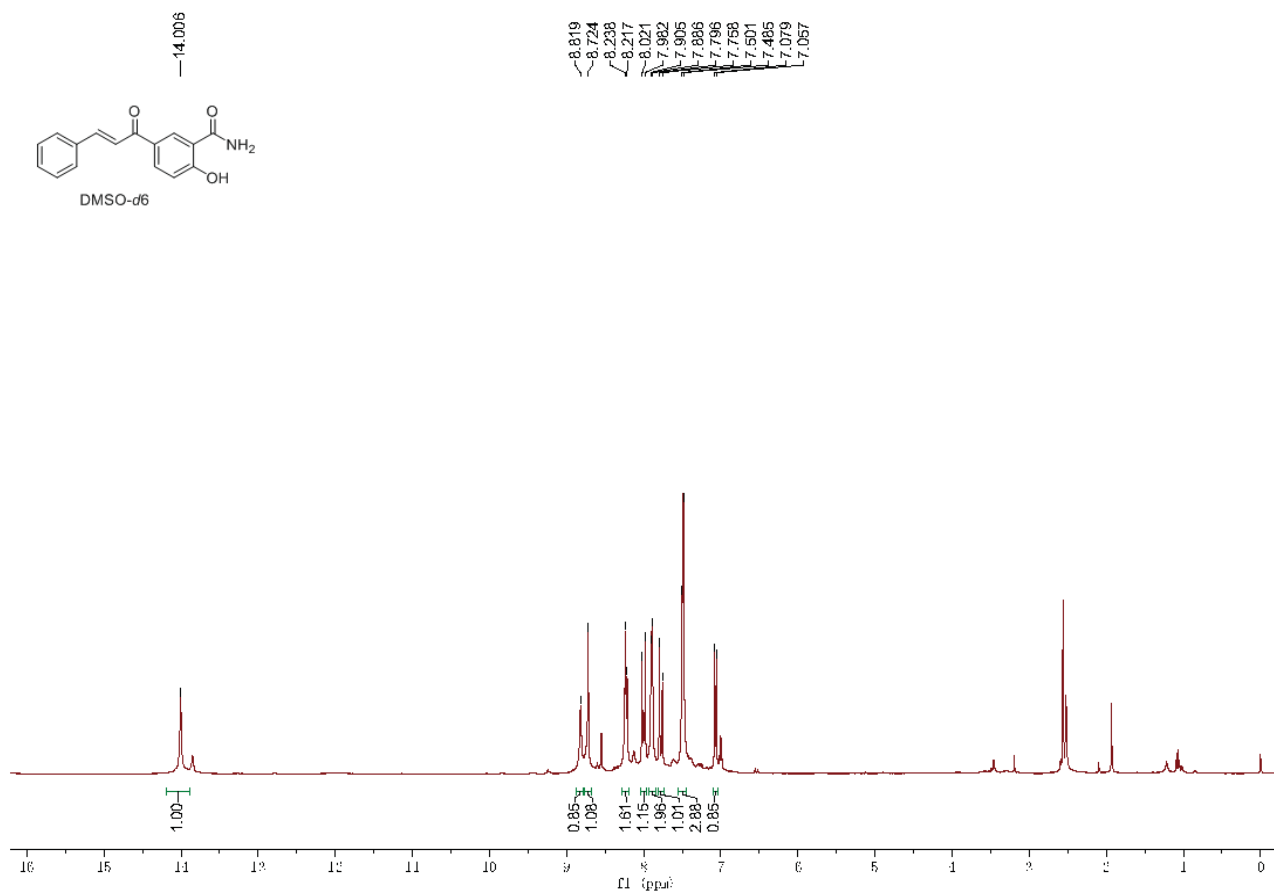

*(E)*-5-cinnamoyl-2-hydroxybenzamide (**a5**)

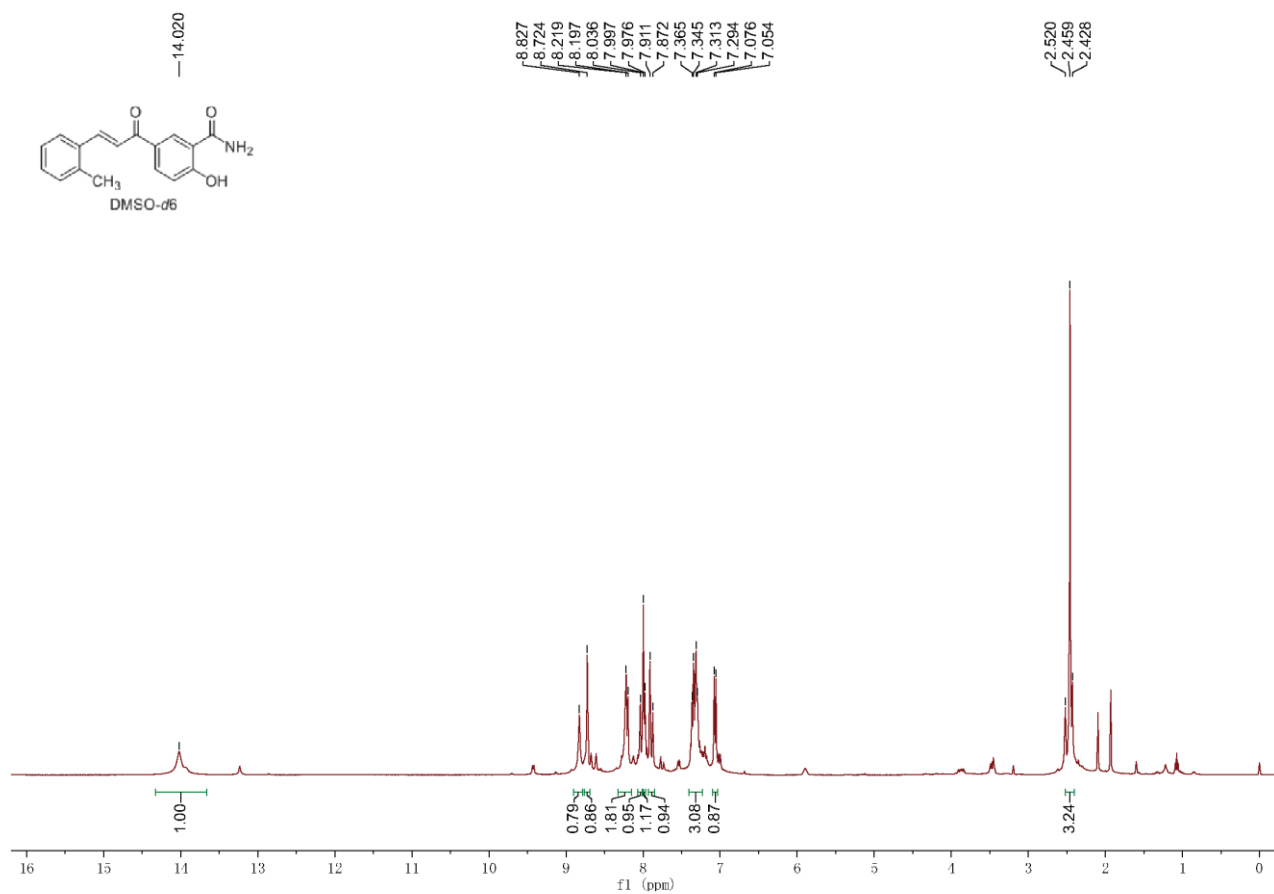

*(E)*-2-hydroxy-5-(3-(*o*-tolyl)acryloyl)benzamide (**a6**)

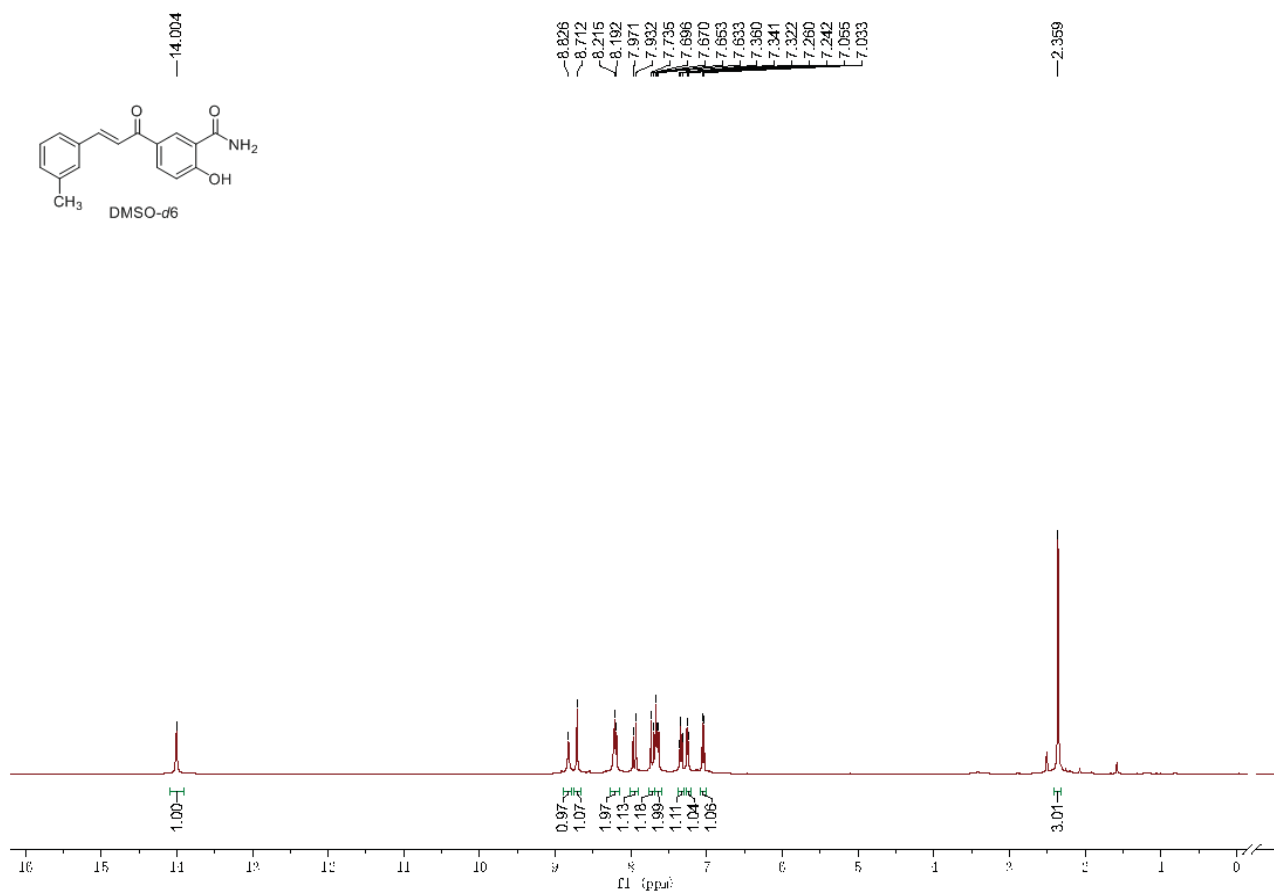

*(E)*-2-hydroxy-5-(3-(*m*-tolyl)acryloyl)benzamide (**a7**)

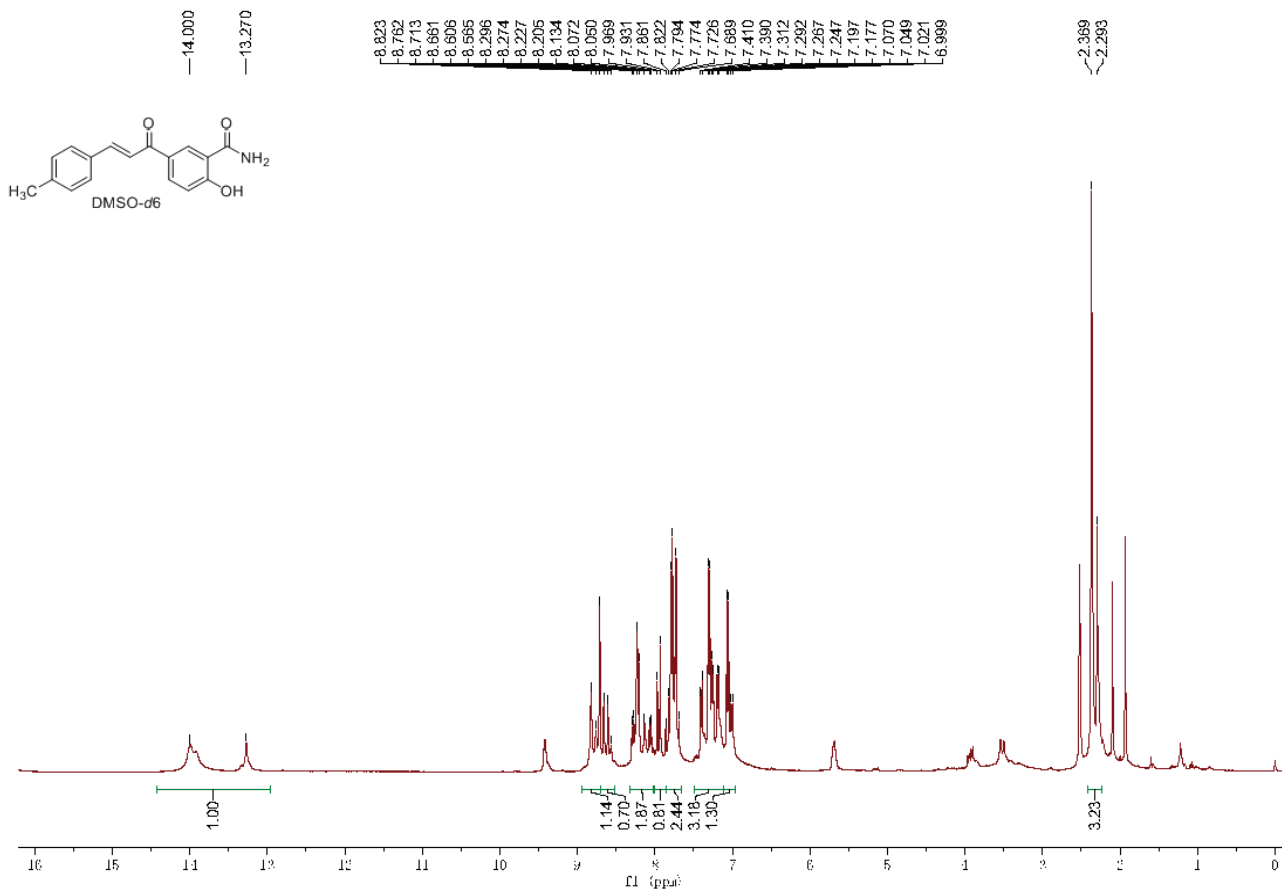

*(E)*-2-hydroxy-5-(3-(*p*-tolyl)acryloyl)benzamide (**a8**)

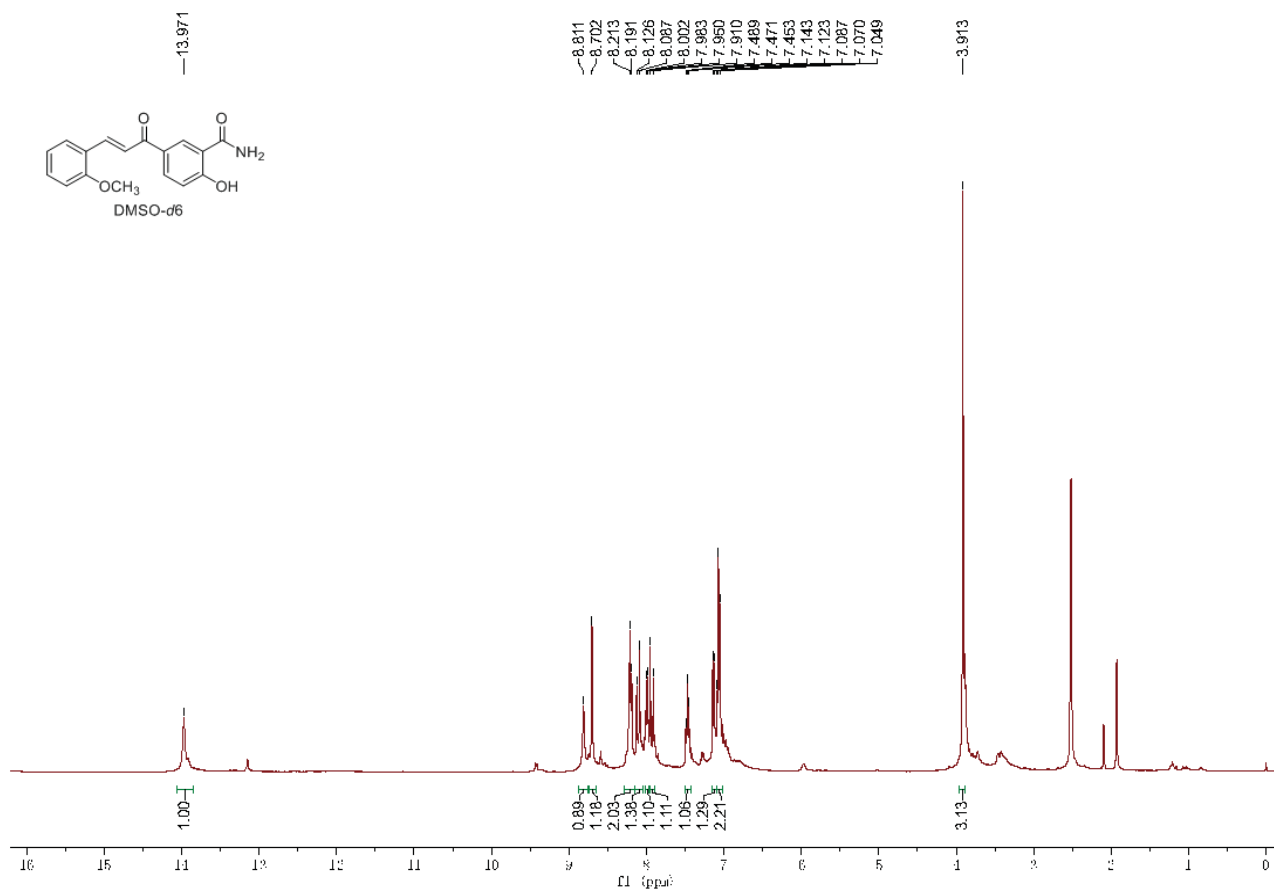

*(E)*-2-hydroxy-5-(3-(2-methoxyphenyl)acryloyl)benzamide (**a9**)

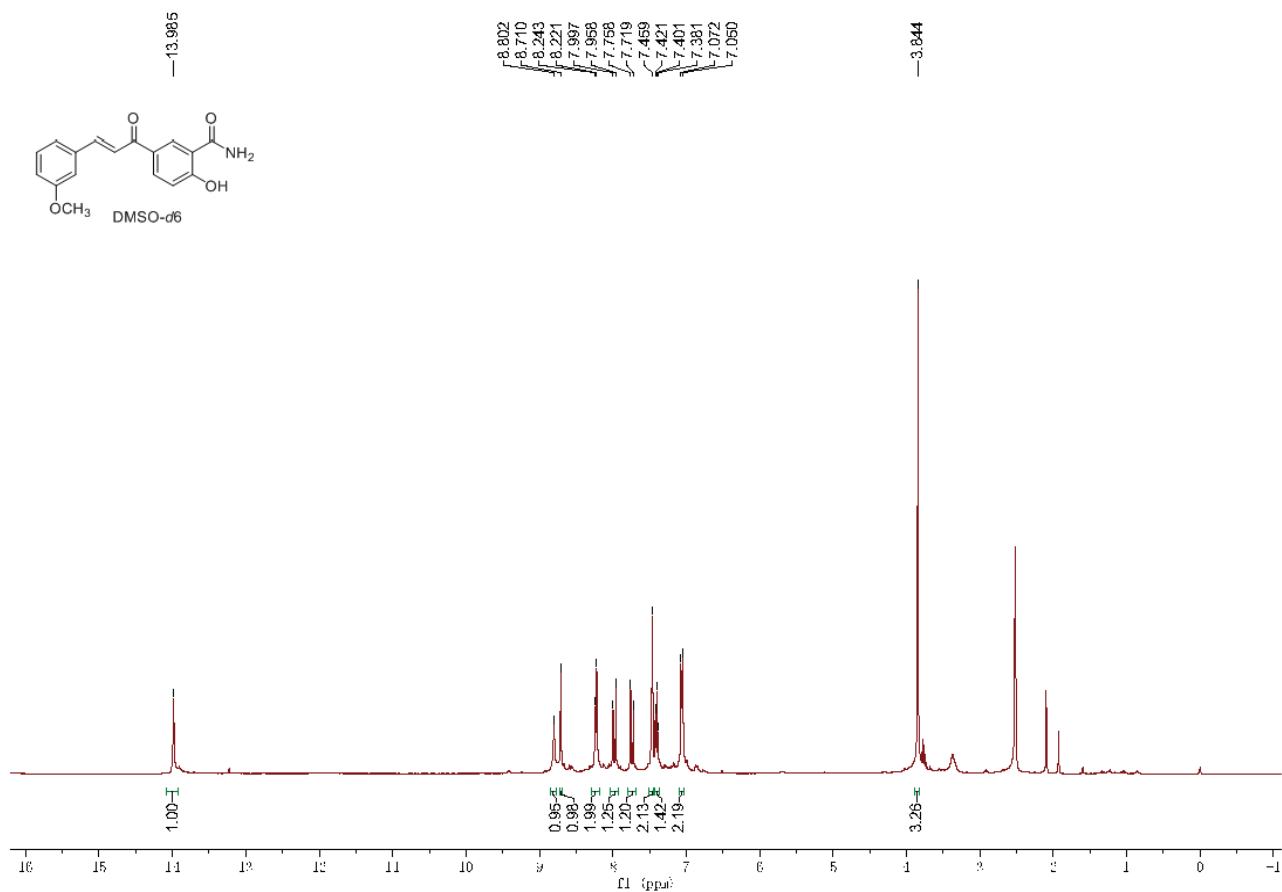

*(E)*-2-hydroxy-5-(3-(3-methoxyphenyl)acryloyl)benzamide (**a10**)

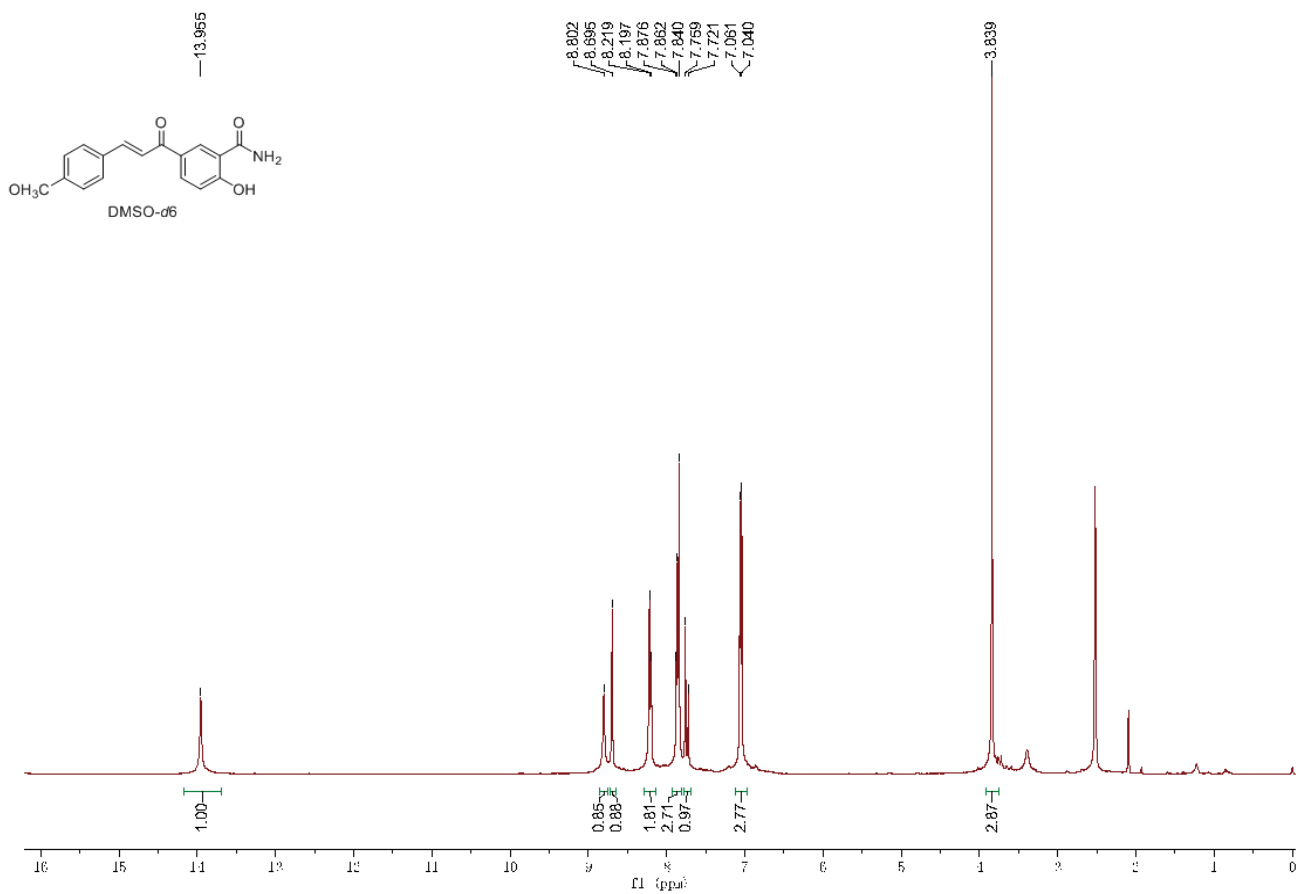

*(E)*-2-hydroxy-5-(3-(4-methoxyphenyl)acryloyl)benzamide (**a11**)



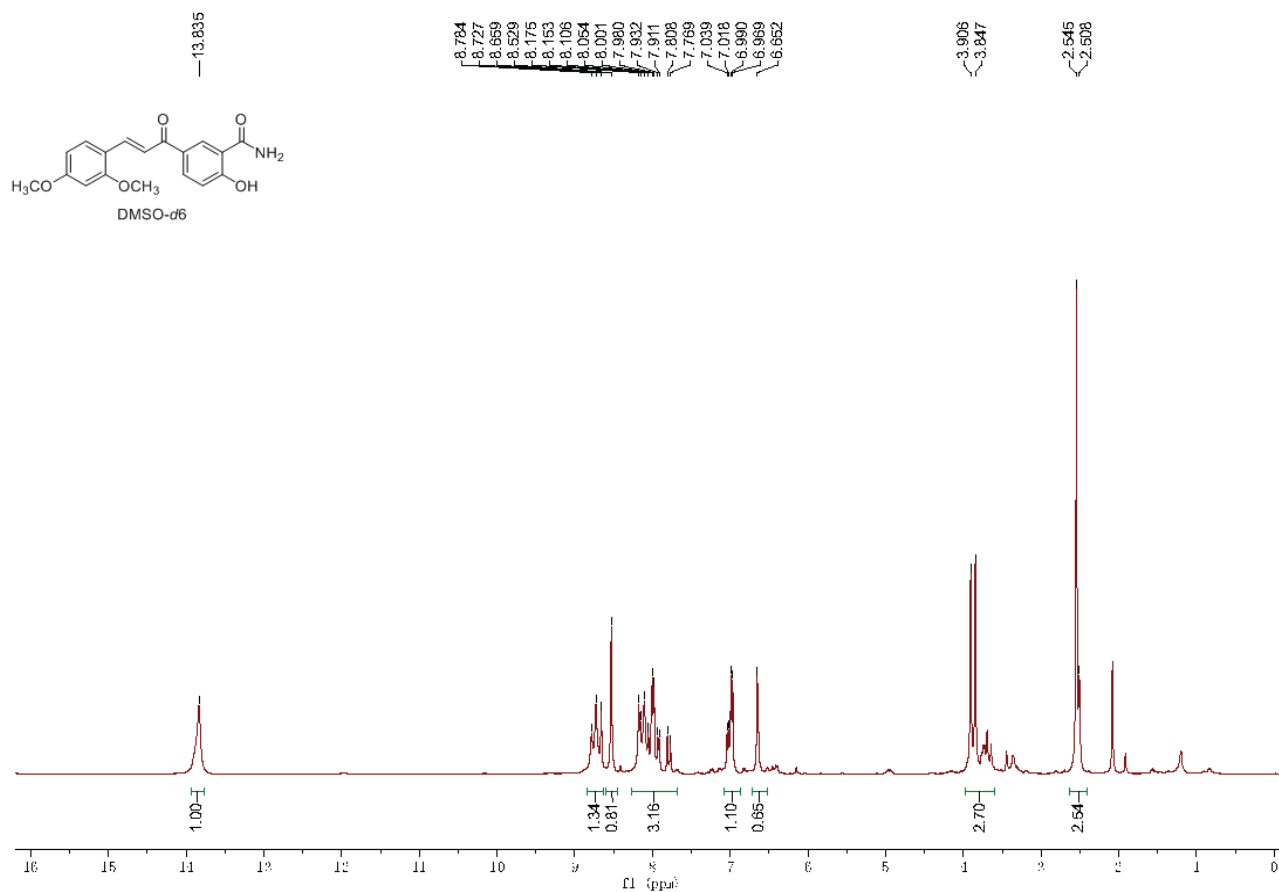

*(E)*-5-(3-(2,4-dimethoxyphenyl)acryloyl)-2-hydroxybenzamide (**a12**)

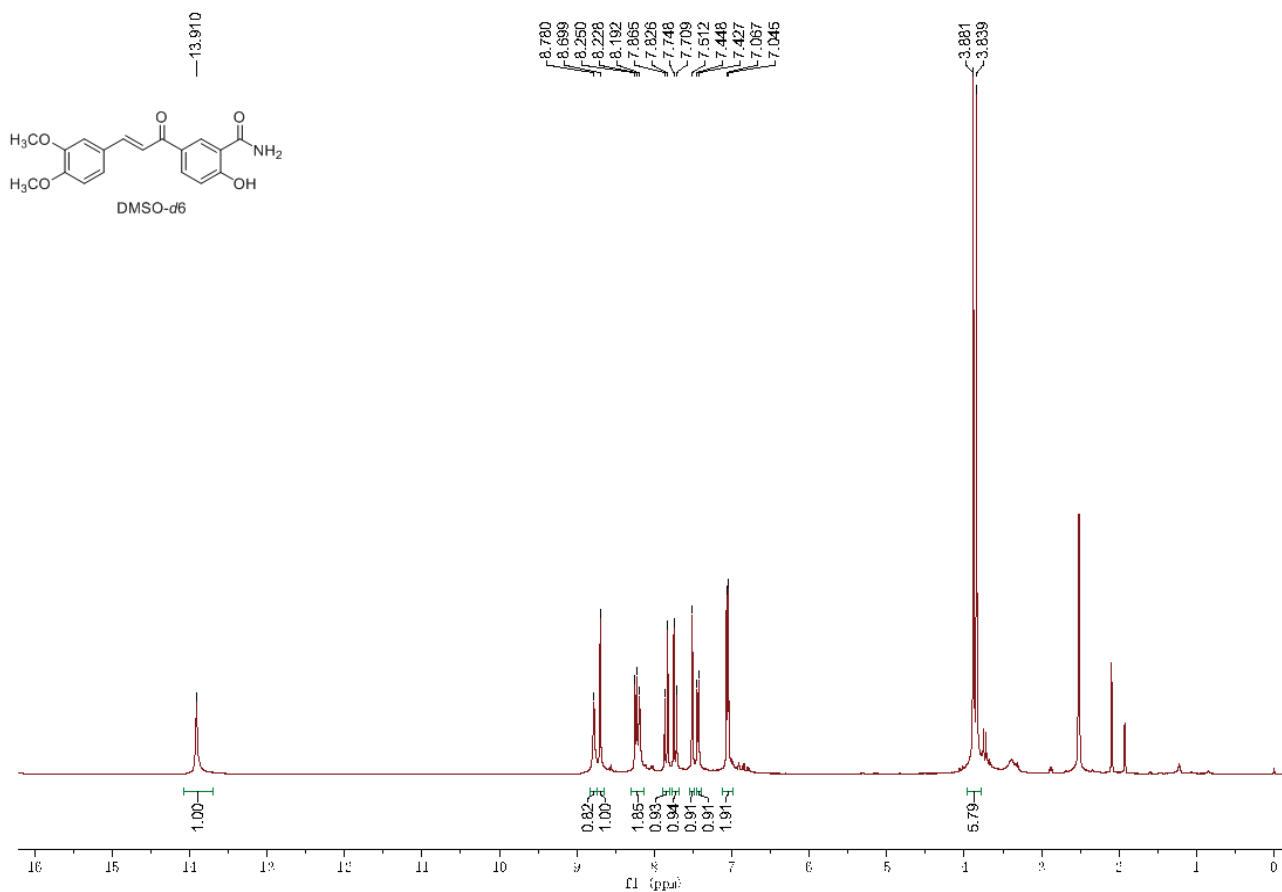

*(E)*-5-(3-(3,4-dimethoxyphenyl)acryloyl)-2-hydroxybenzamide (**a13**)

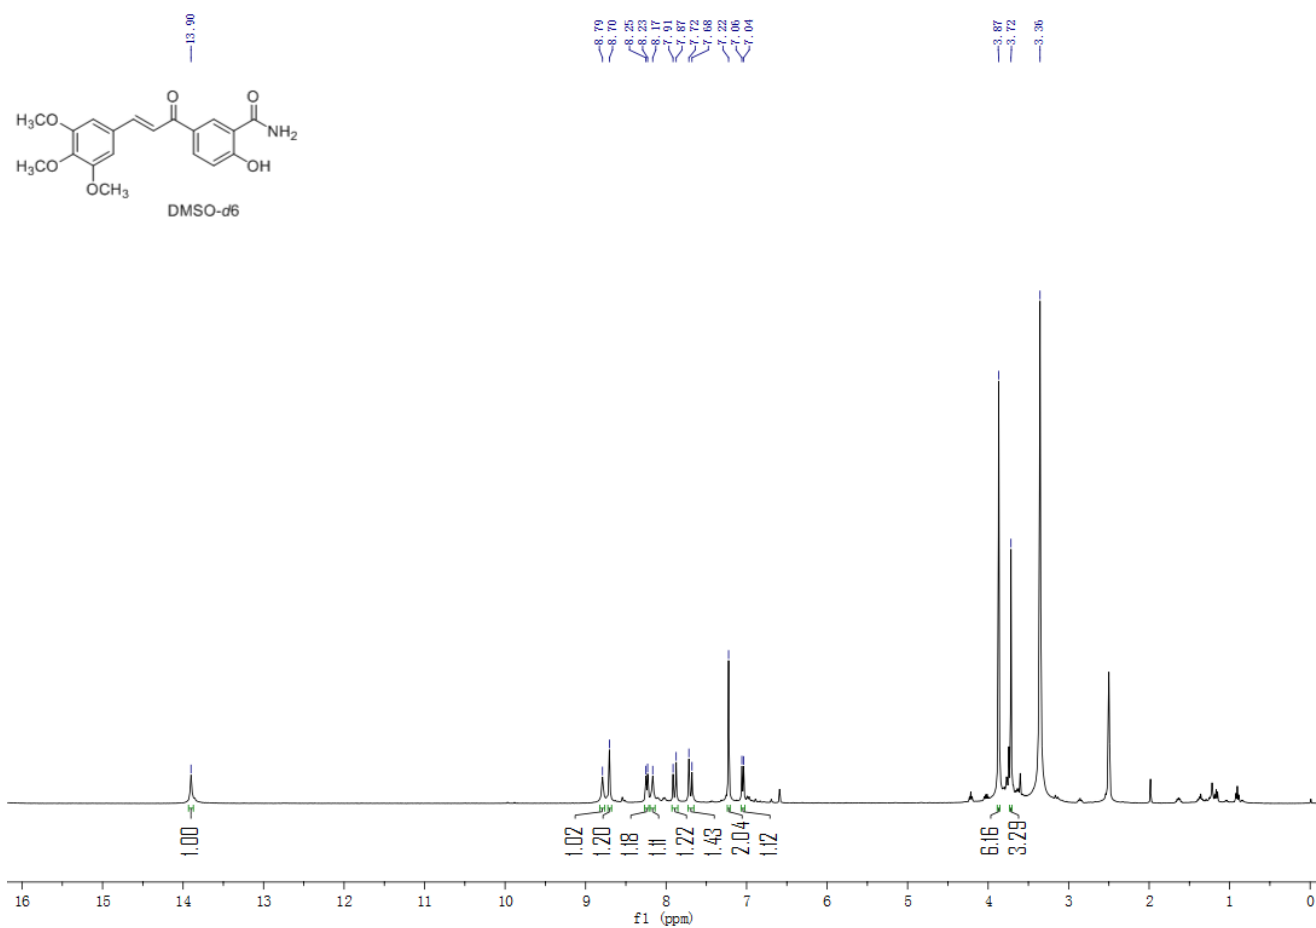

*(E)*-2-hydroxy-5-(3-(3,4,5-trimethoxyphenyl)acryloyl)benzamide (**a14**)

### 3. C-NMR information of the synthesized compounds

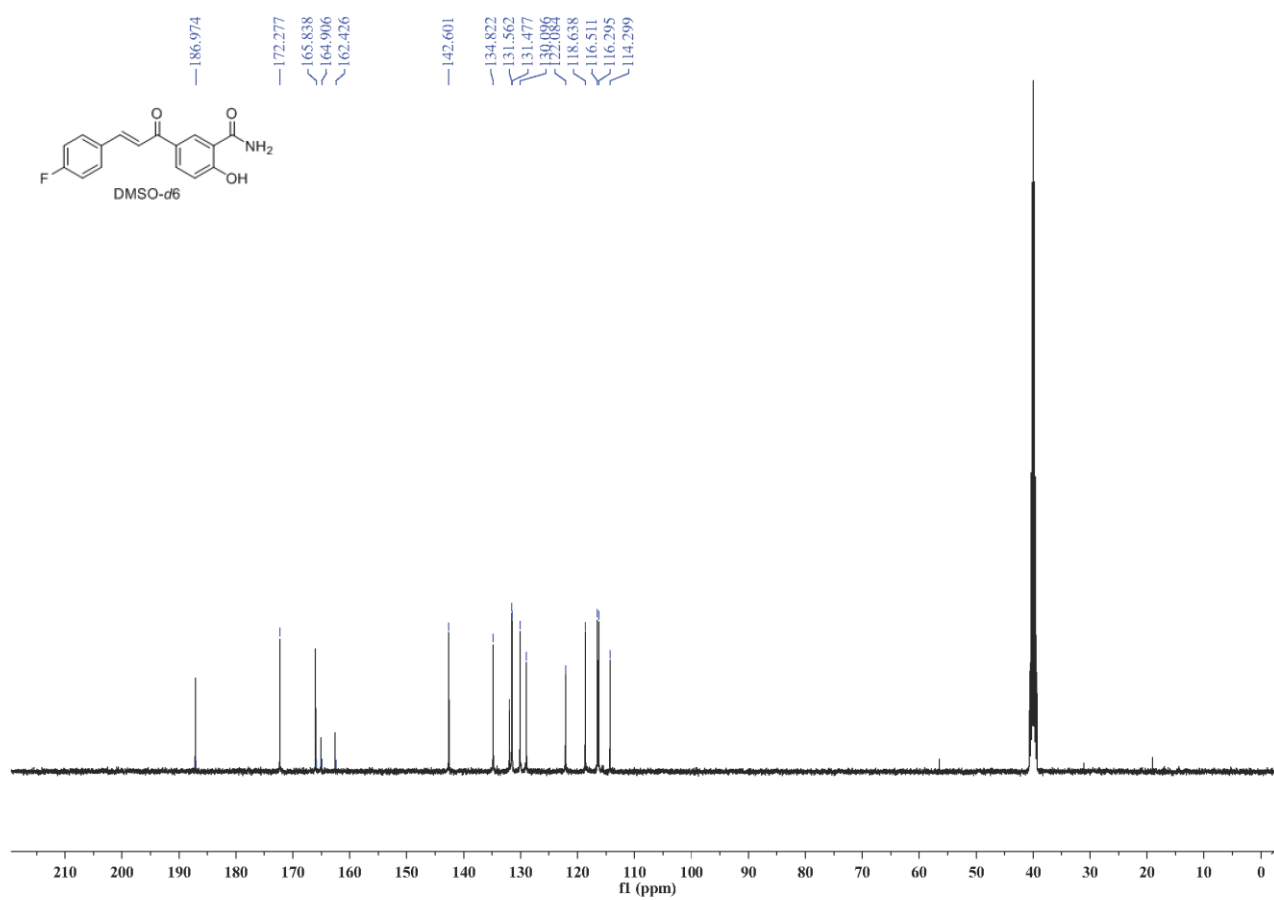

*(E)*-5-(3-(4-fluorophenyl)acryloyl)-2-hydroxybenzamide (**a1**)

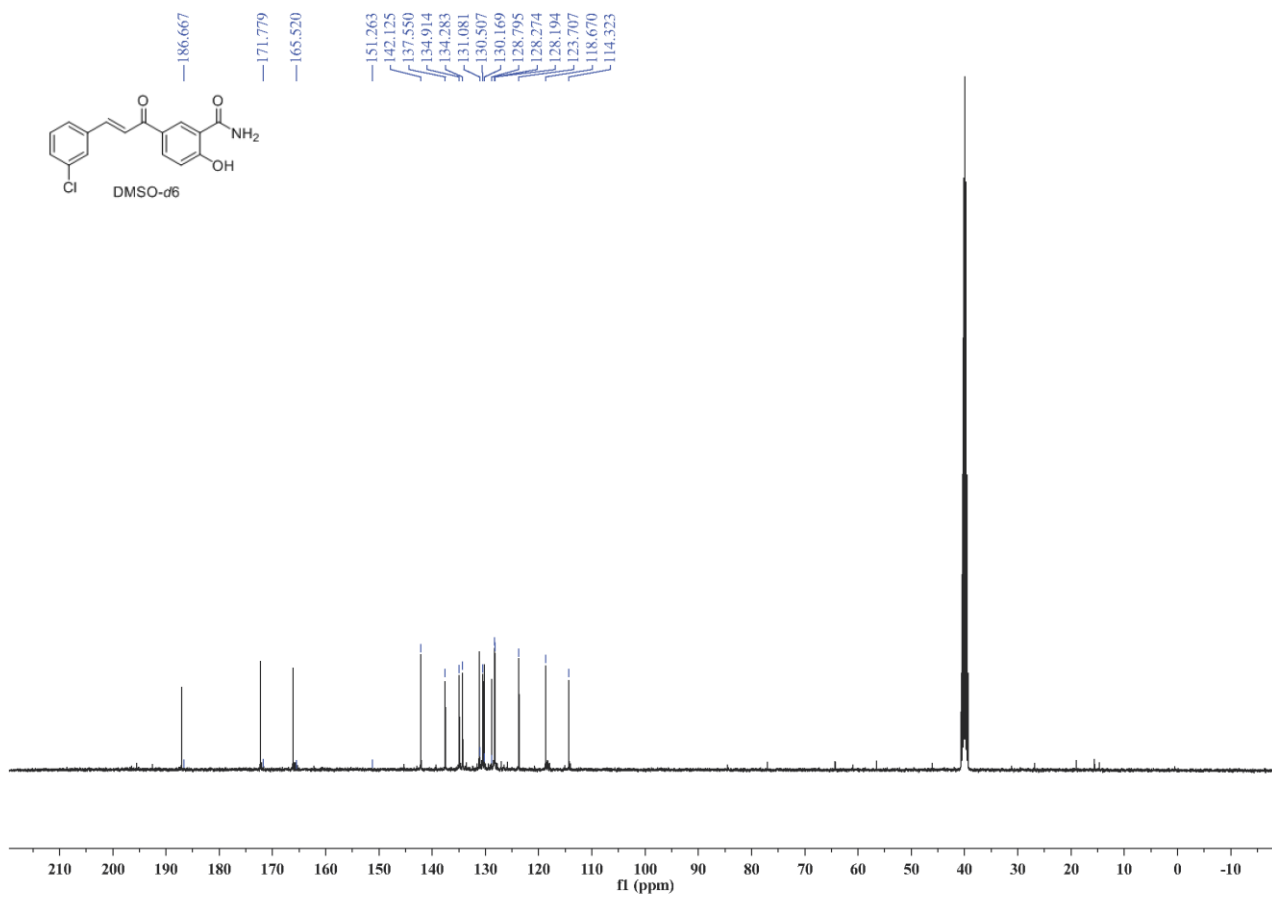

*(E)*-5-(3-(3-chlorophenyl)acryloyl)-2-hydroxybenzamide (**a2**)

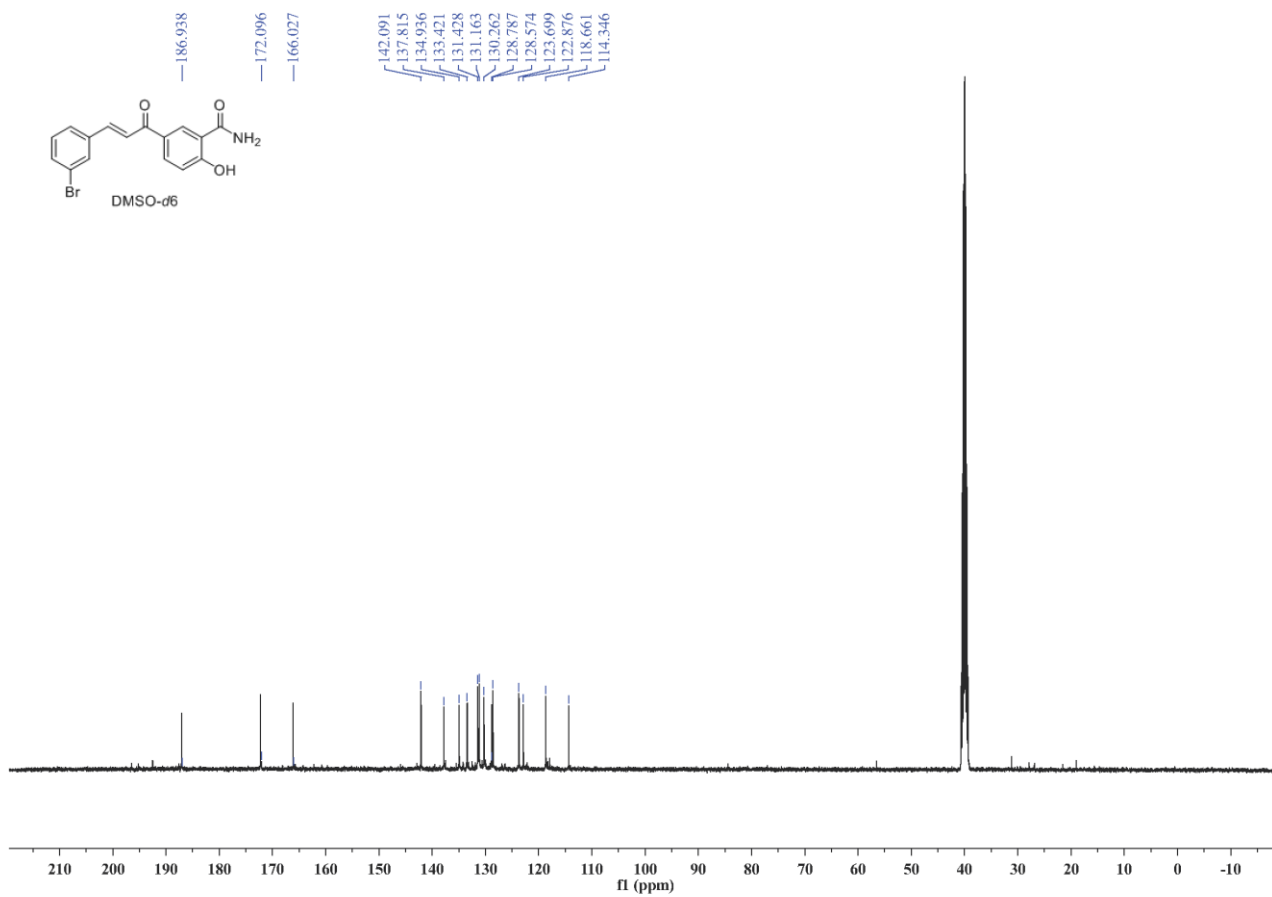

*(E)*-5-(3-(3-bromophenyl)acryloyl)-2-hydroxybenzamide (**a3**)

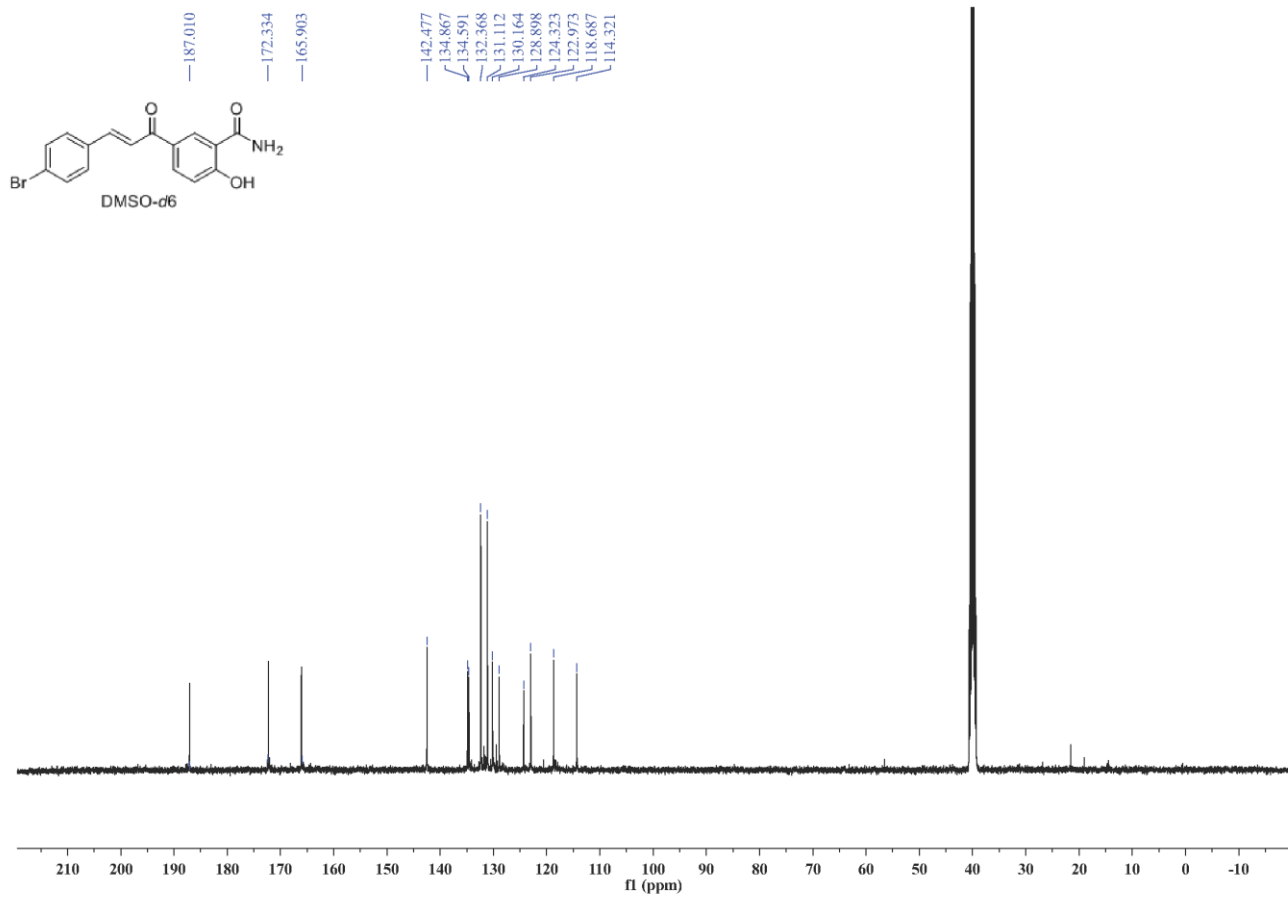

*(E)*-5-(3-(4-bromophenyl)acryloyl)-2-hydroxybenzamide (**a4**)

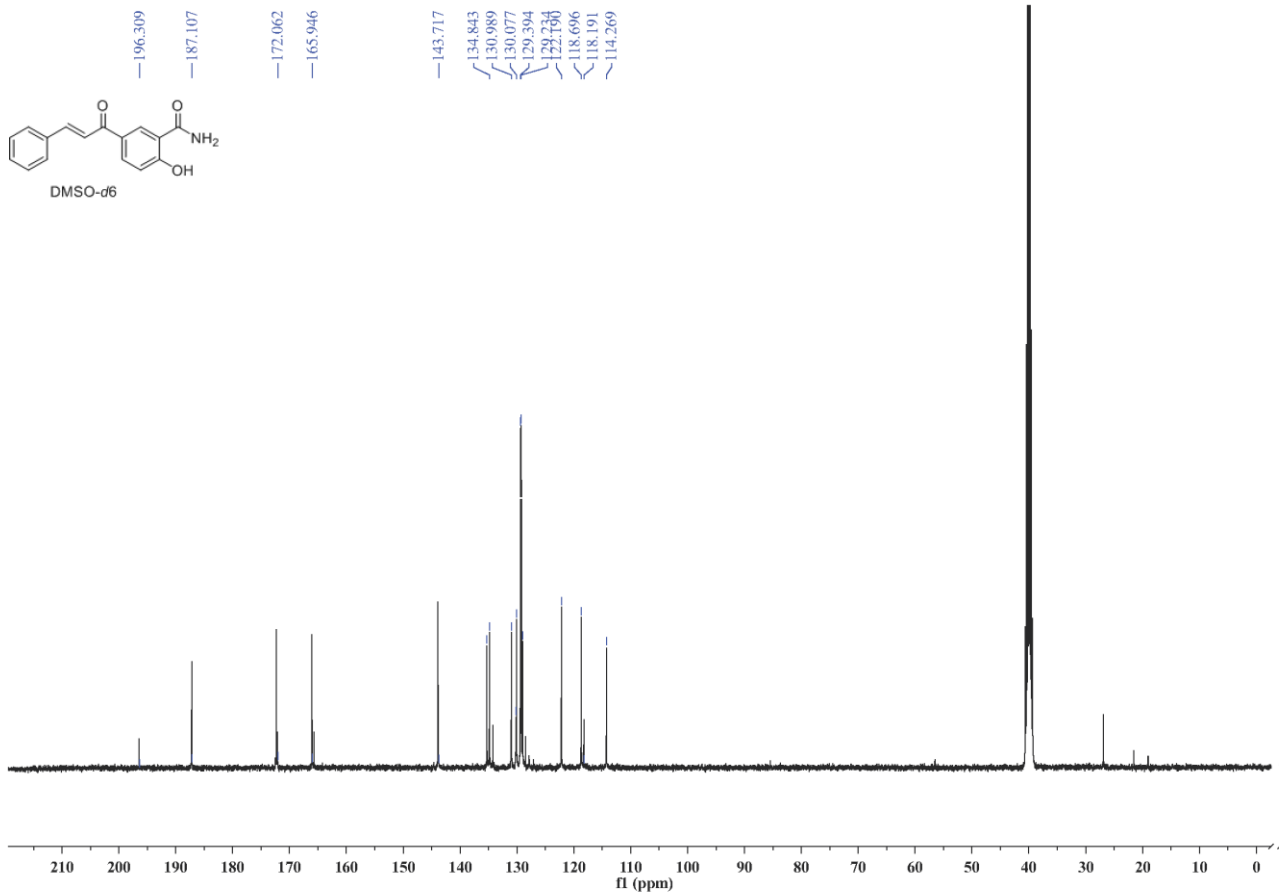

*(E)*-5-cinnamoyl-2-hydroxybenzamide (**a5**)



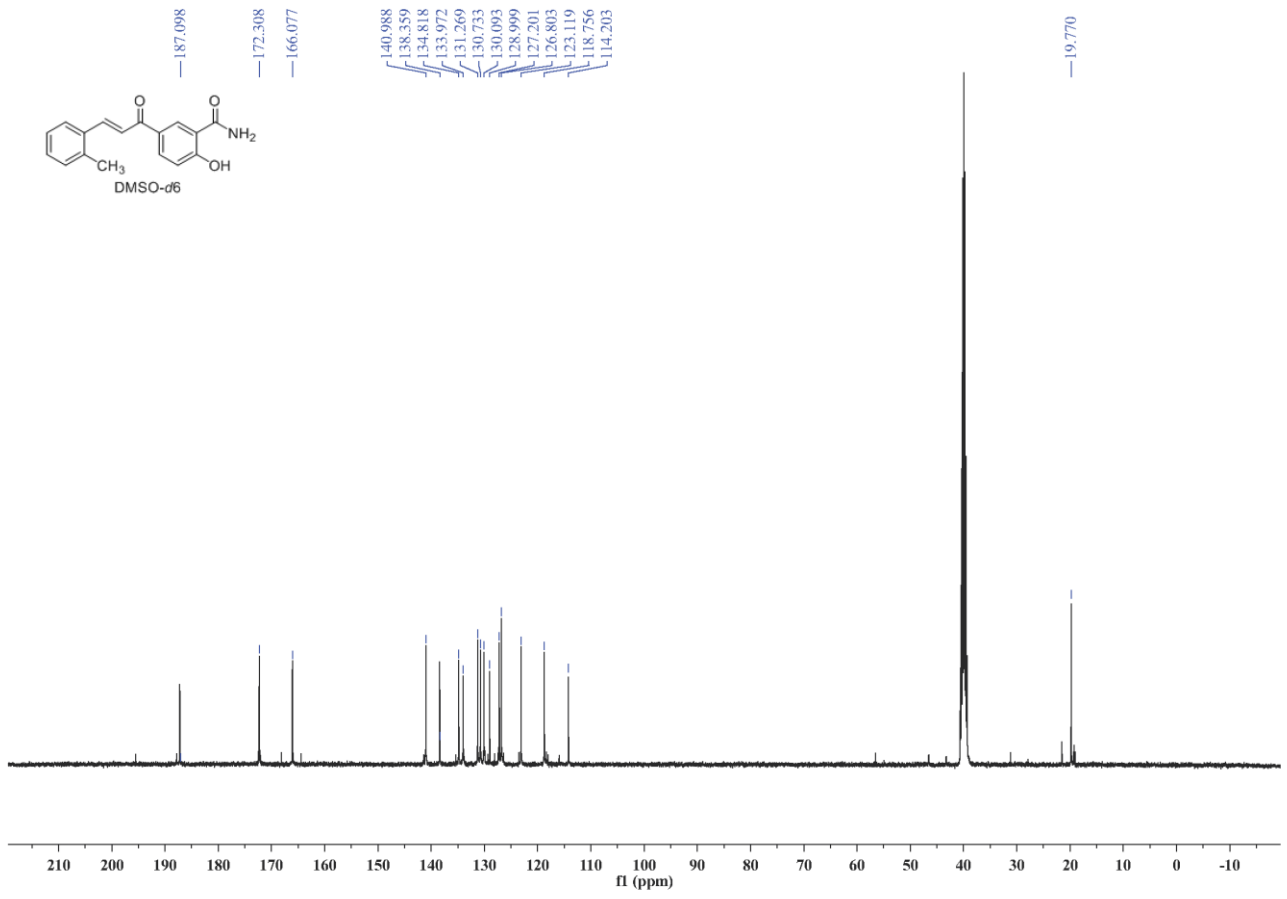

*(E)*-2-hydroxy-5-(3-(*o*-tolyl)acryloyl)benzamide(**a6**)

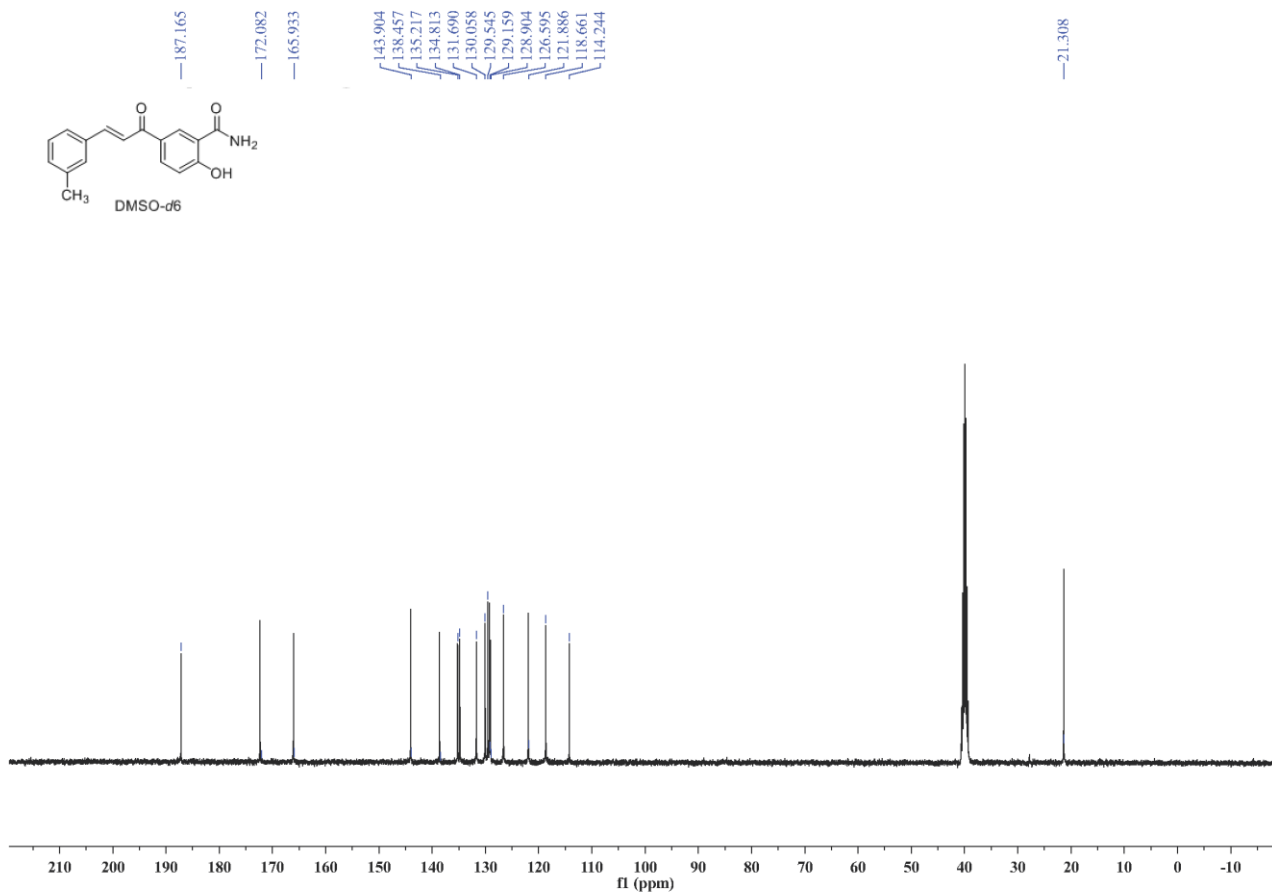

*(E)*-2-hydroxy-5-(3-(*m*-tolyl)acryloyl)benzamide (**a7**)

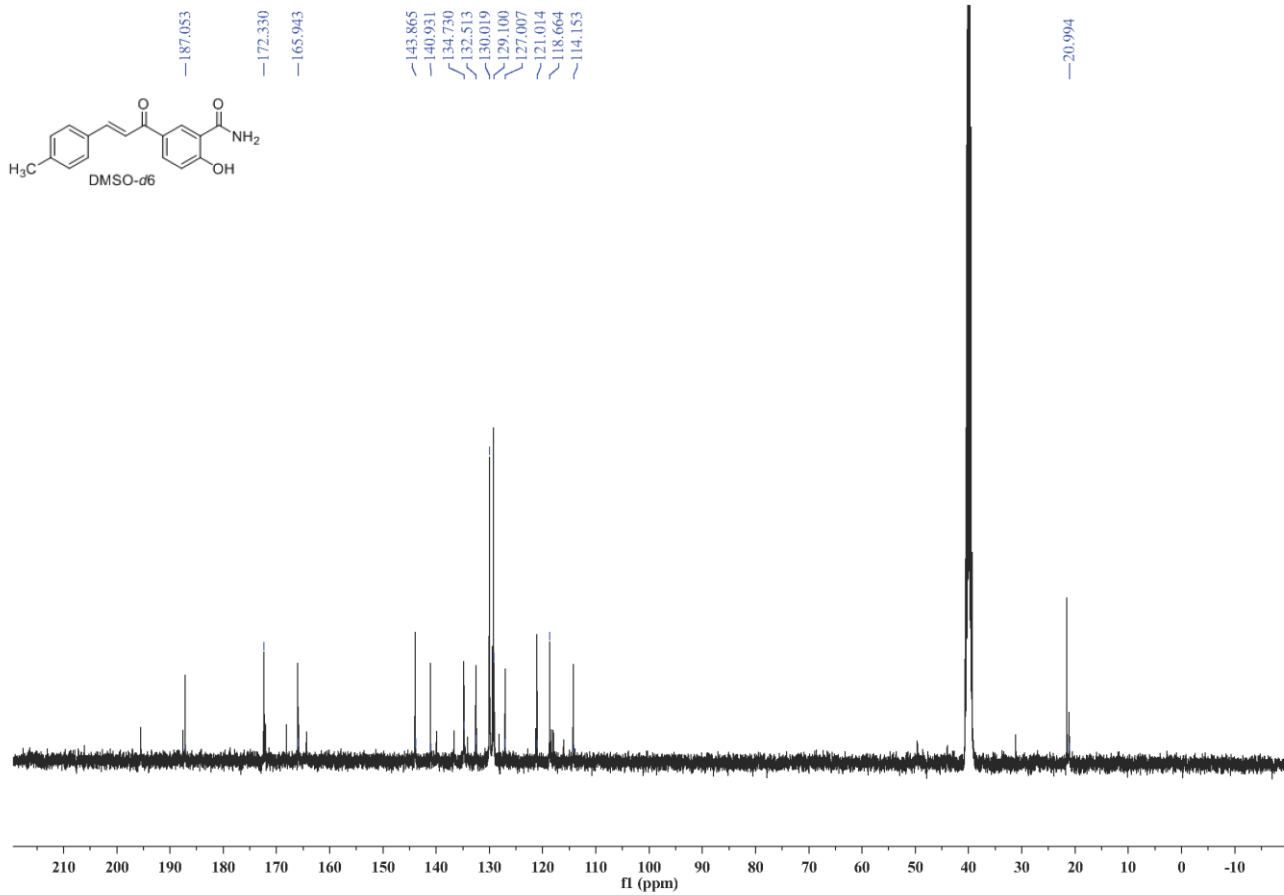

*(E)*-2-hydroxy-5-(3-(*p*-tolyl)acryloyl)benzamide (**a8**)

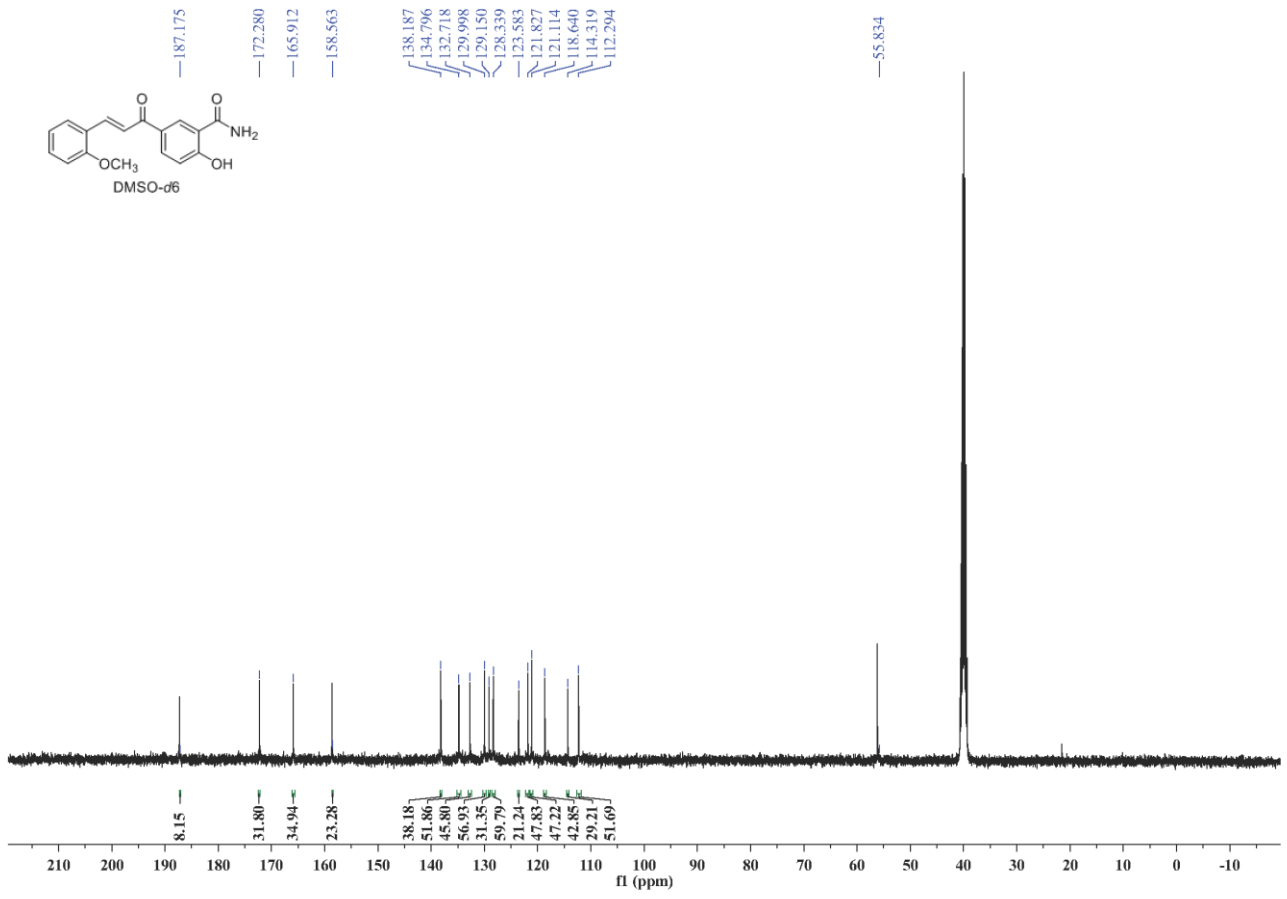

*(E)*-2-hydroxy-5-(3-(2-methoxyphenyl)acryloyl)benzamide (**a9**)

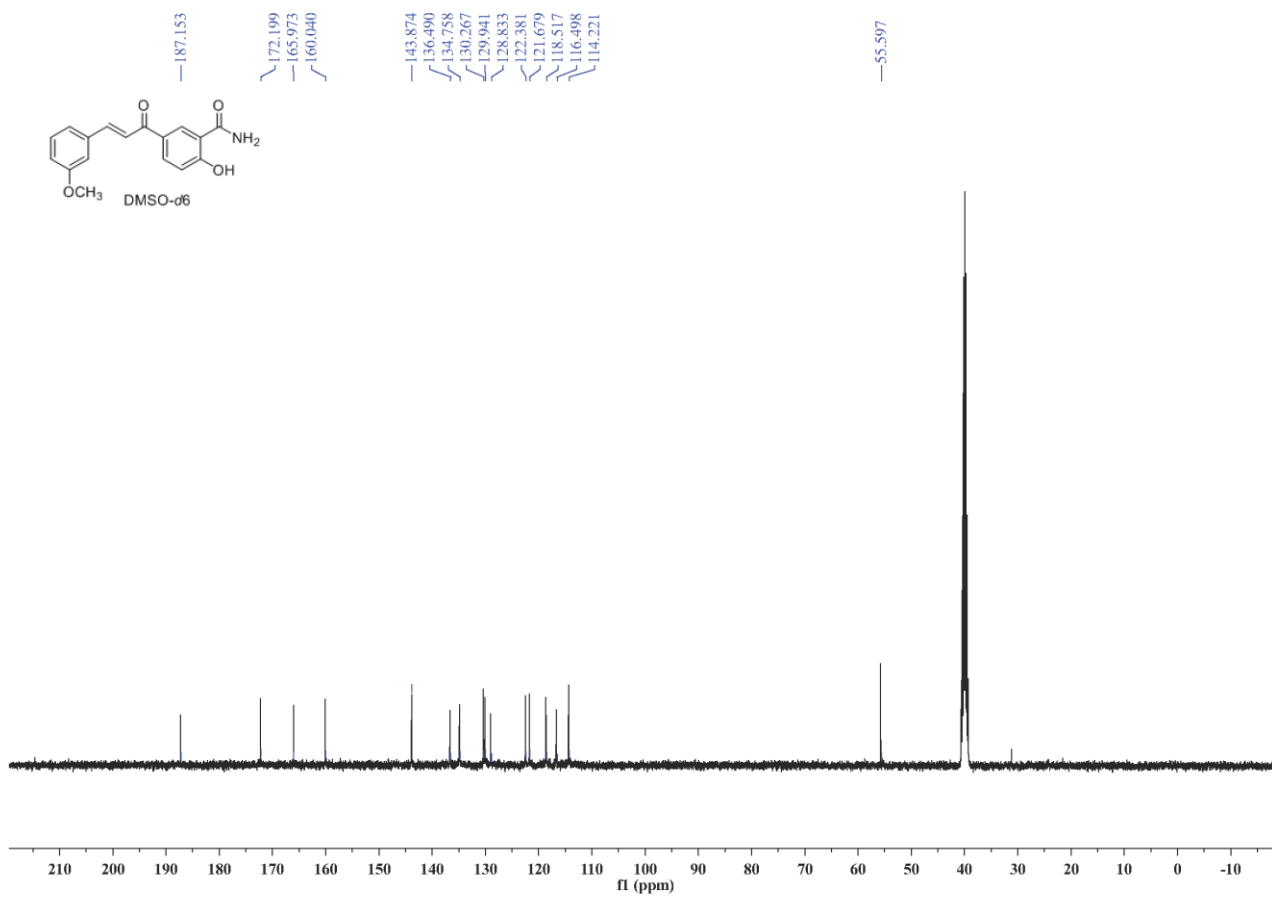

*(E)*-2-hydroxy-5-(3-(3-methoxyphenyl)acryloyl)benzamide (**a10**)

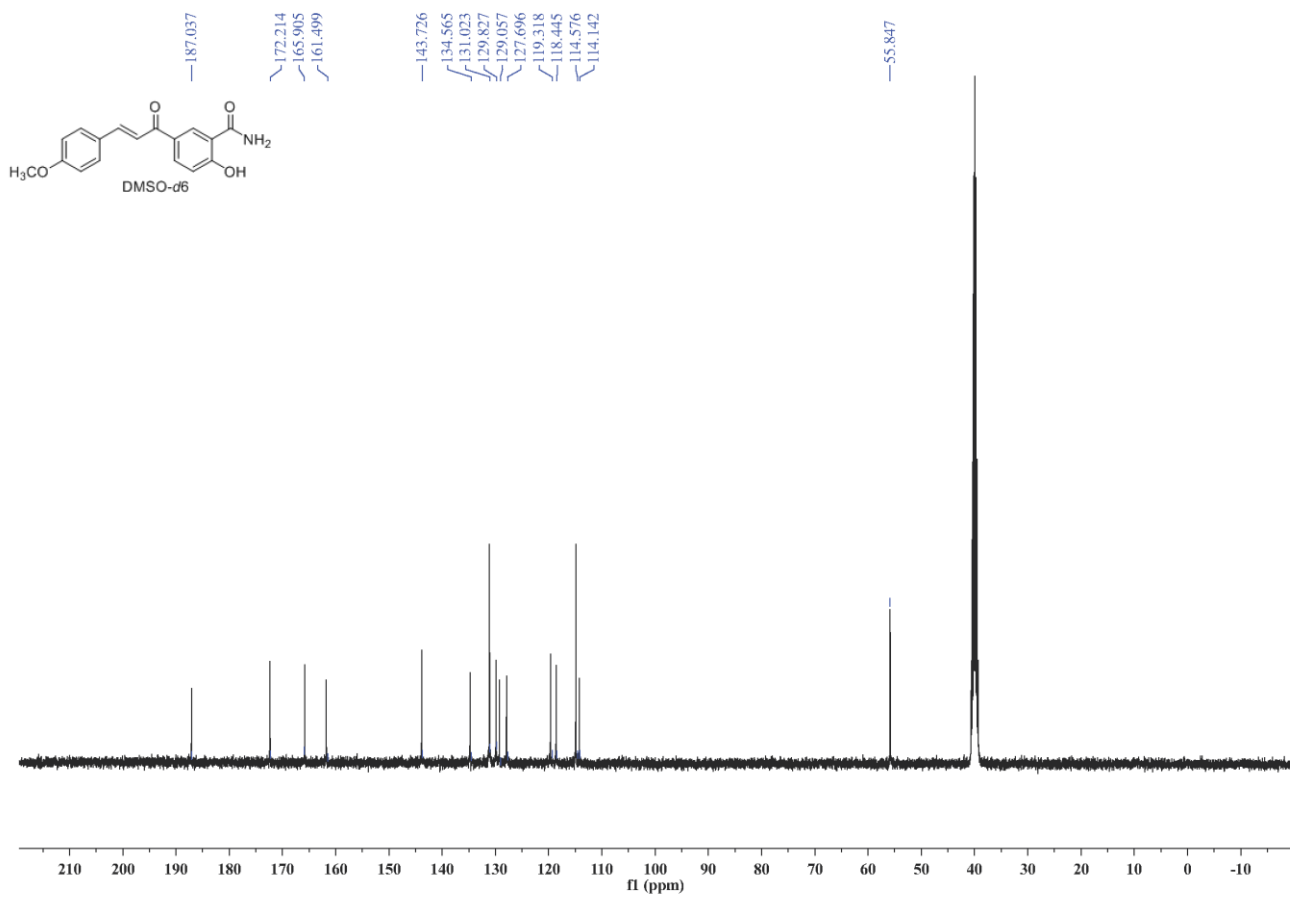

*(E)*-2-hydroxy-5-(3-(4-methoxyphenyl)acryloyl)benzamide (**a11**)

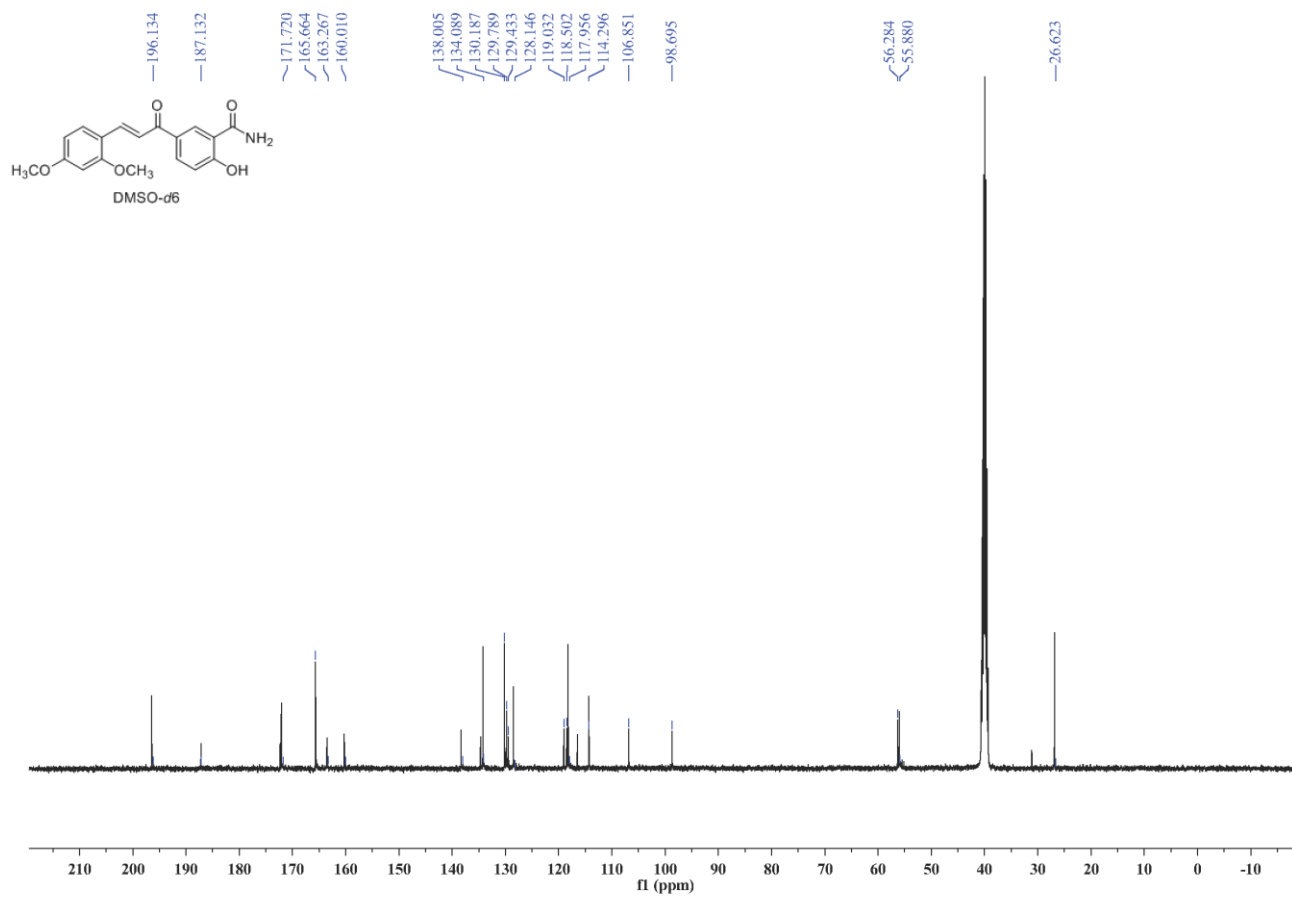

*(E)*-5-(3-(2,4-dimethoxyphenyl)acryloyl)-2-hydroxybenzamide (**a12**)

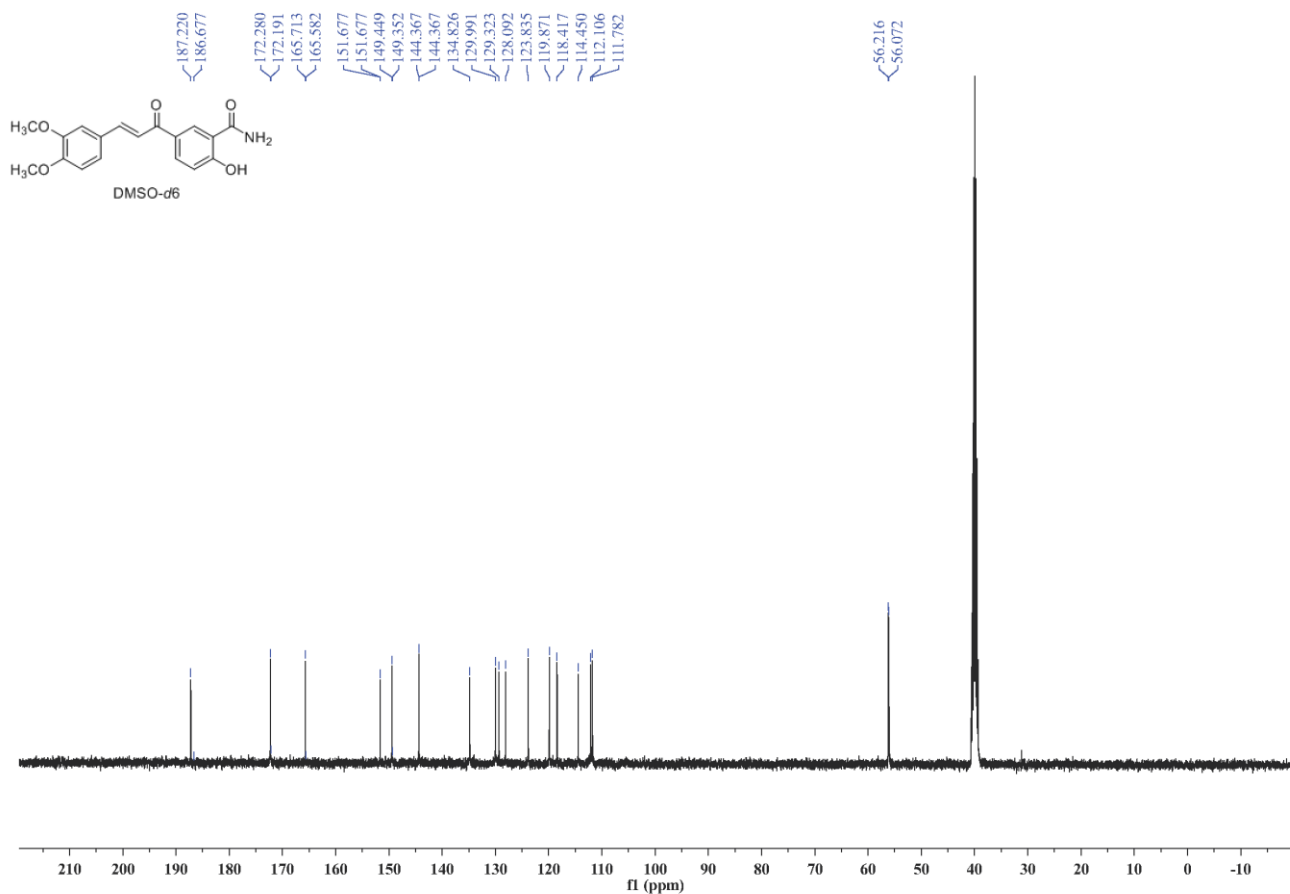

*(E)*-5-(3-(3,4-dimethoxyphenyl)acryloyl)-2-hydroxybenzamide (**a13**)



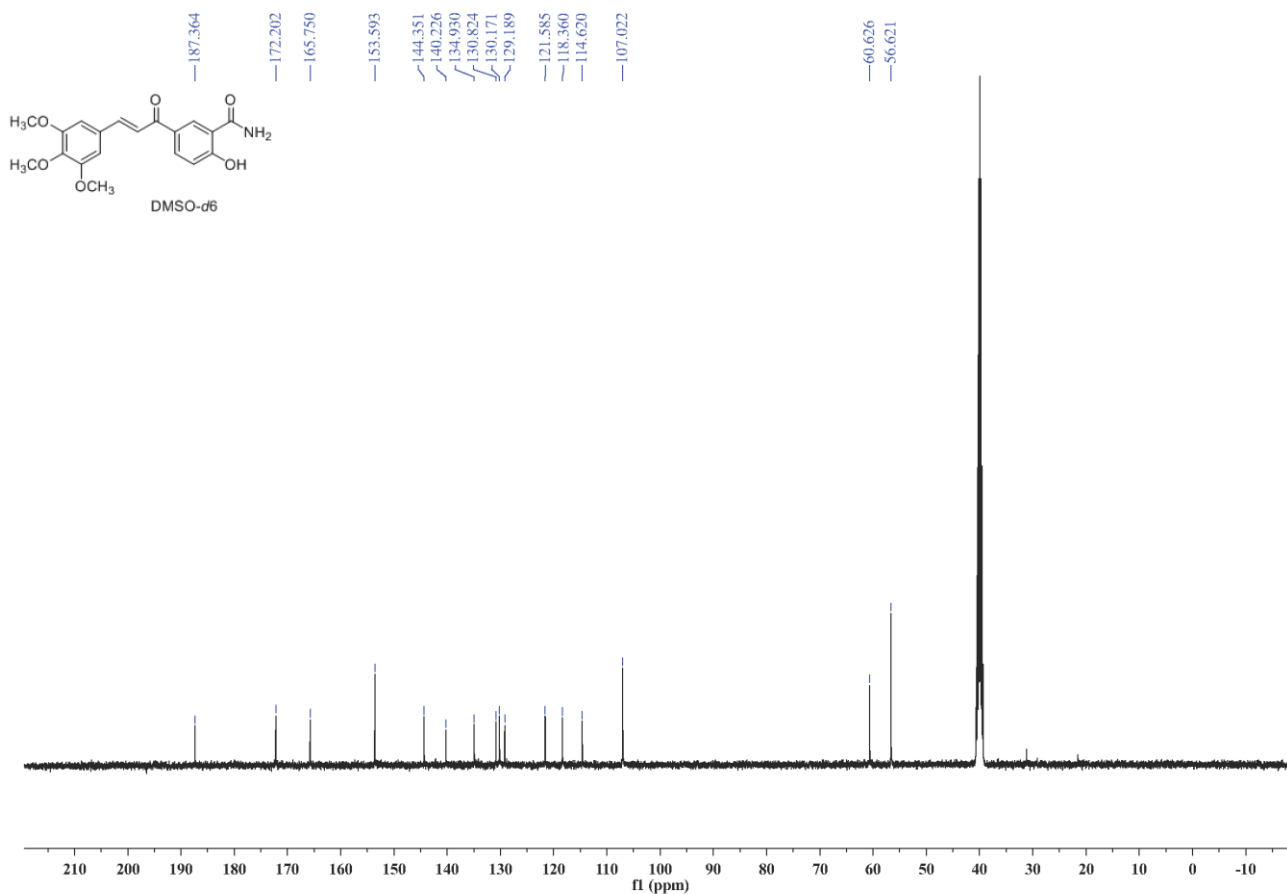

*(E)*-2-hydroxy-5-(3-(3,4,5-trimethoxyphenyl)acryloyl)benzamide (**a14**)

#### 4. HRMS information of the synthesized compounds.

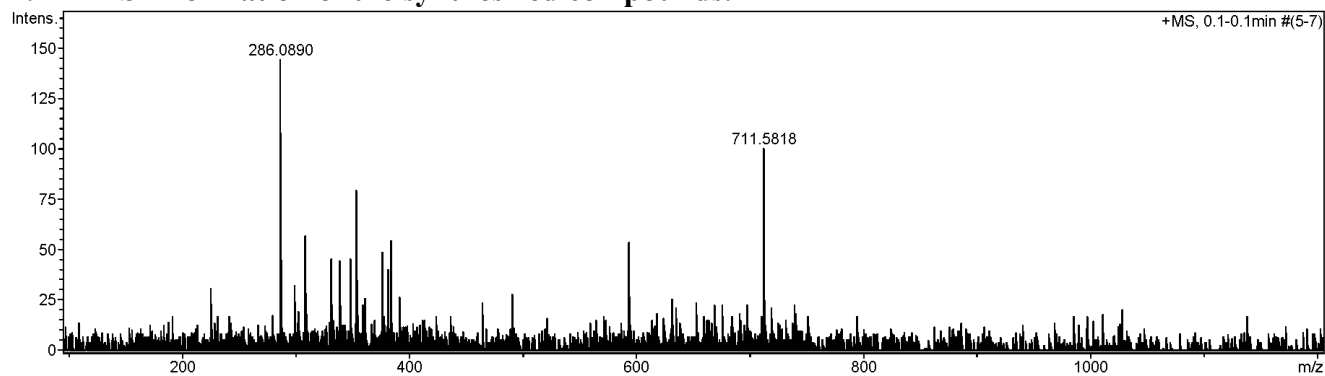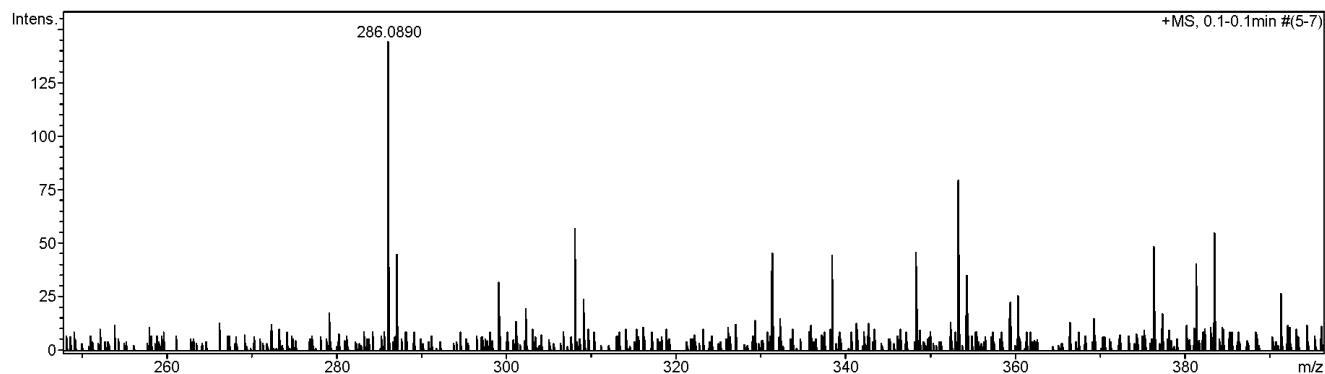

*(E)*-5-(3-(4-fluorophenyl)acryloyl)-2-hydroxybenzamide (**a1**)

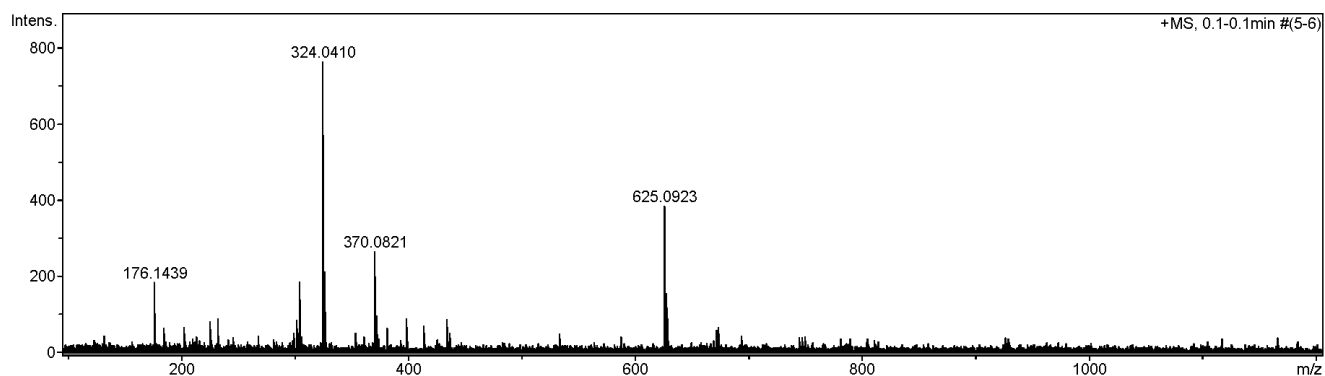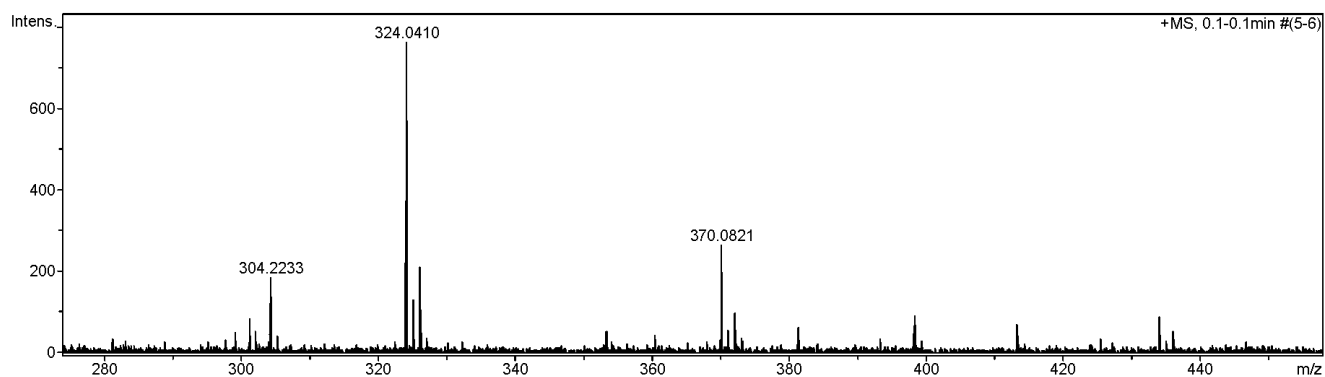

*(E)*-5-(3-(3-chlorophenyl)acryloyl)-2-hydroxybenzamide (**a2**)

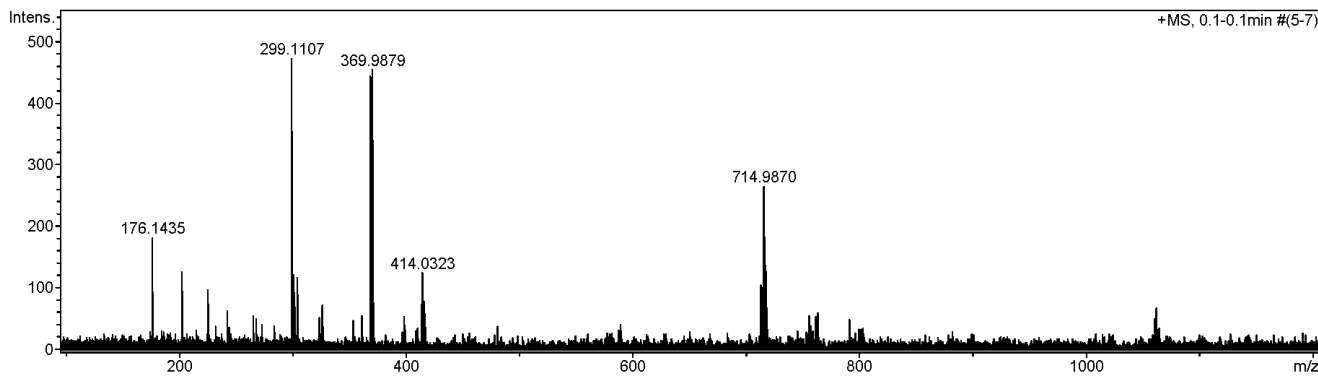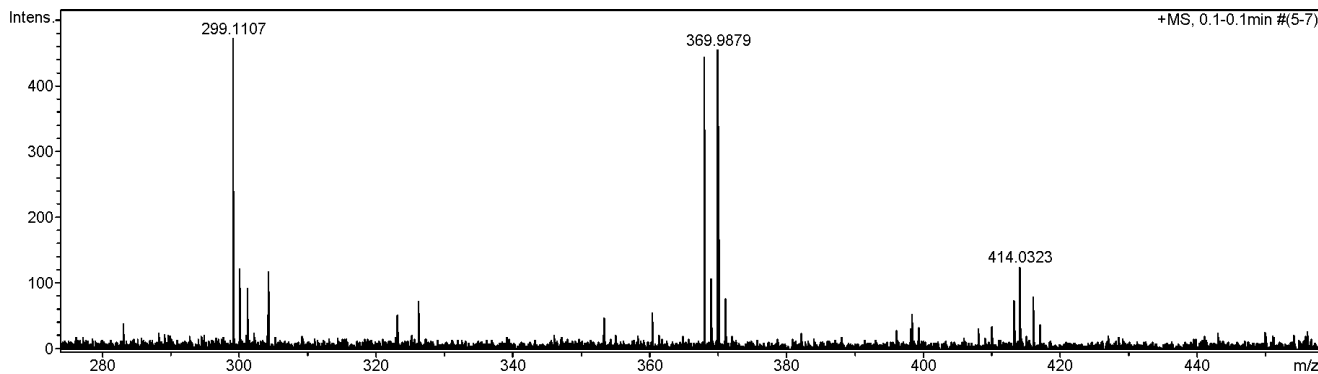

*(E)*-5-(3-(3-bromophenyl)acryloyl)-2-hydroxybenzamide (**a3**)

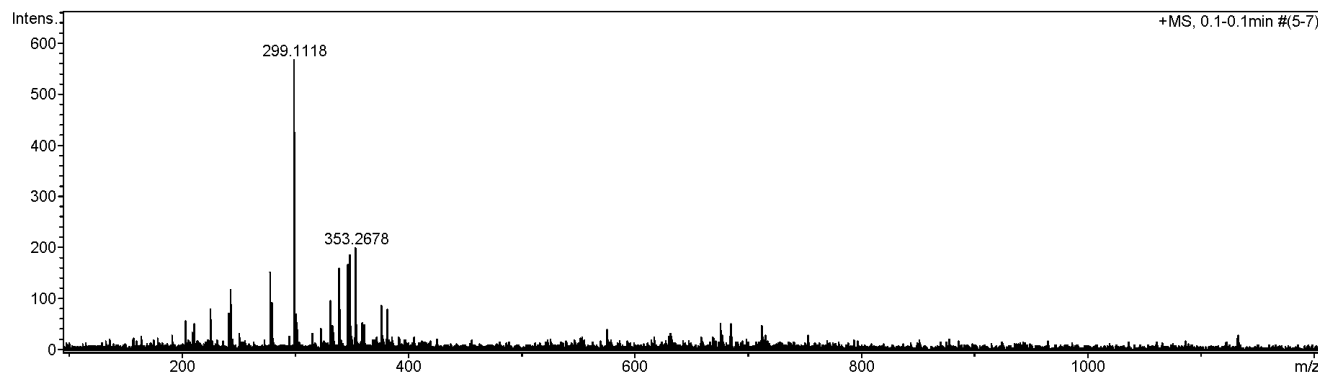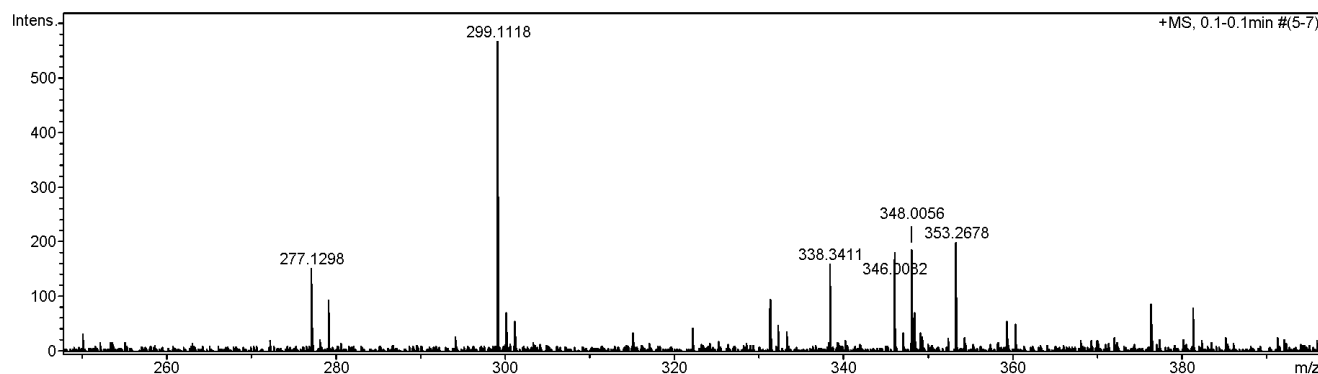

*(E)*-5-(3-(4-bromophenyl)acryloyl)-2-hydroxybenzamide (**a4**)

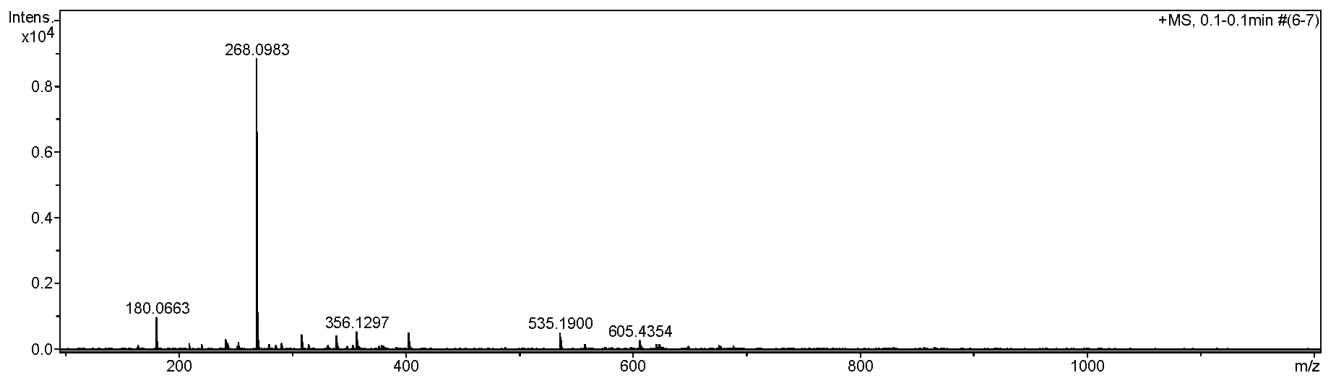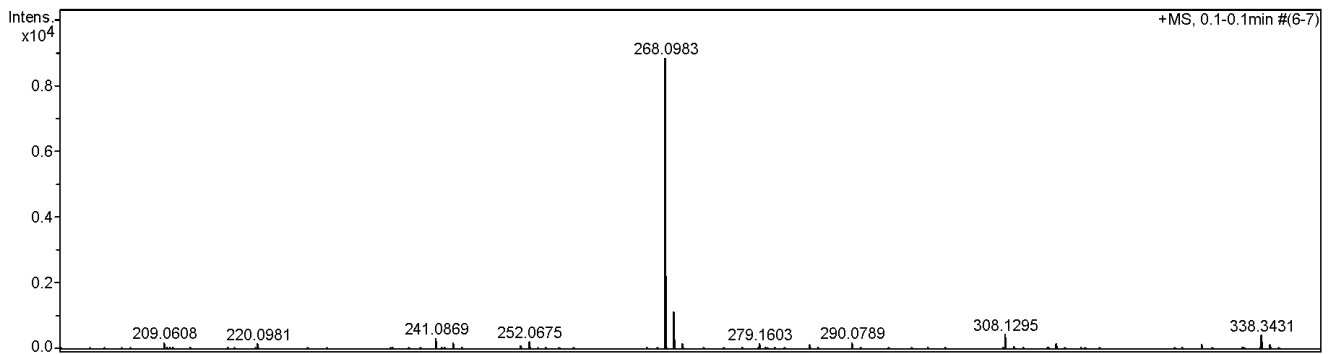

*(E)*-5-cinnamoyl-2-hydroxybenzamide (**a5**)

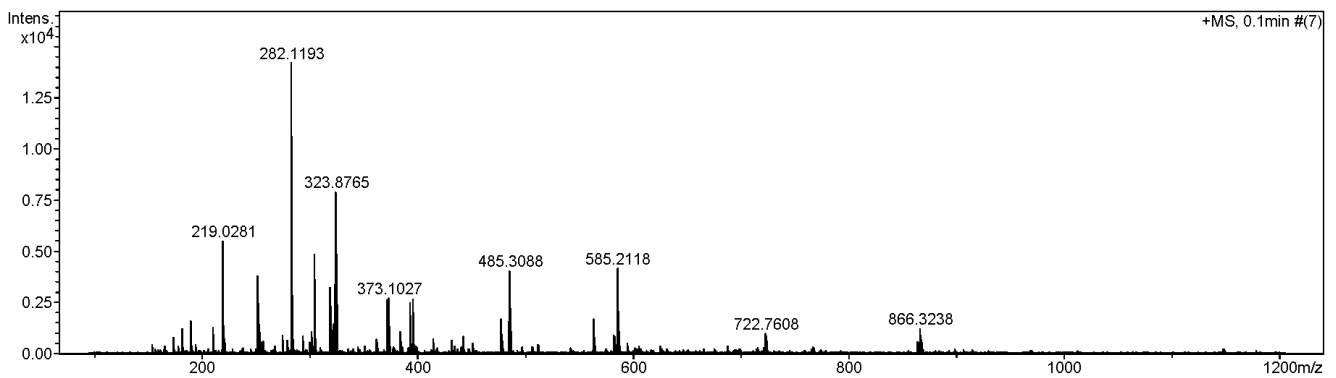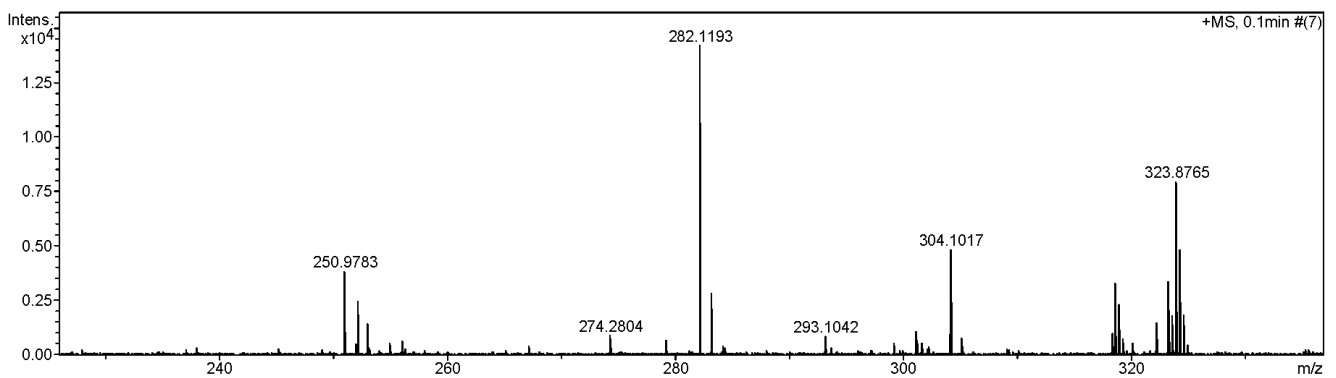

*(E)*-2-hydroxy-5-(3-(*o*-tolyl)acryloyl)benzamide (**a6**)

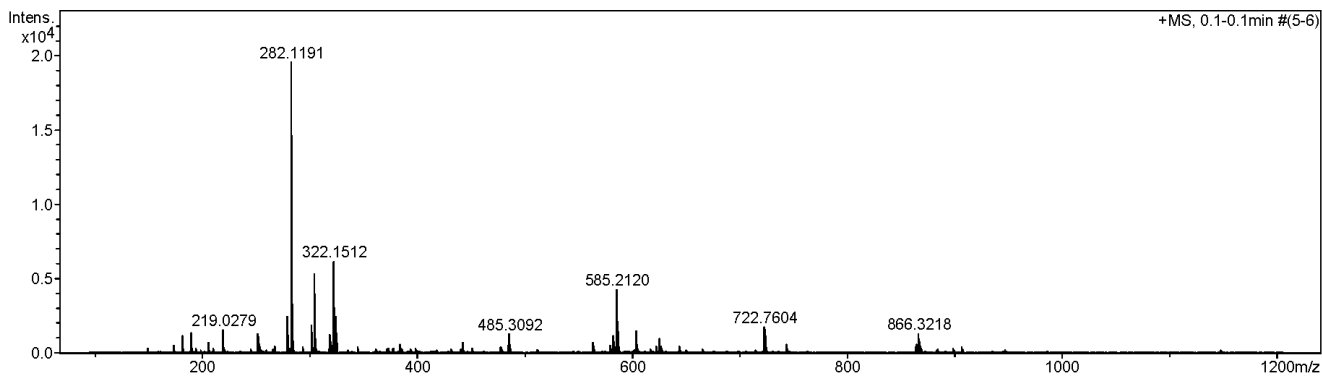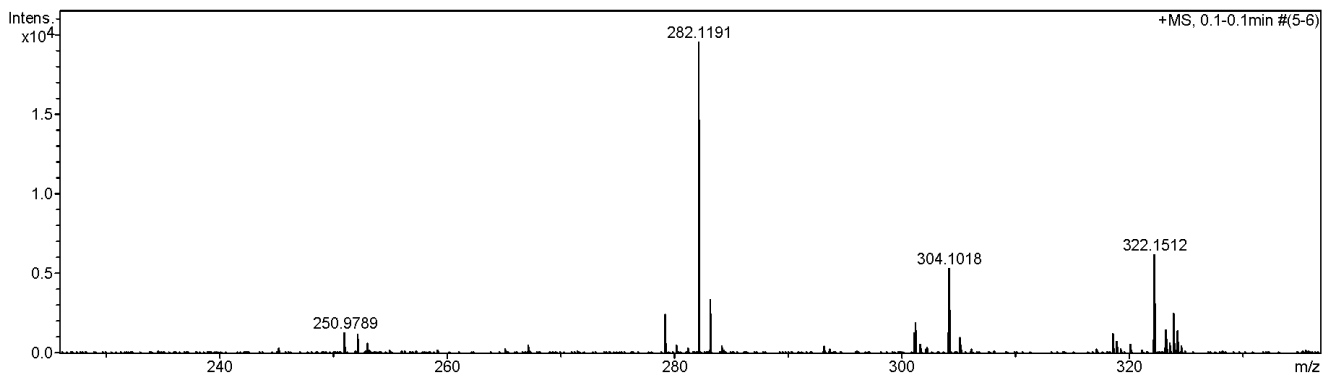

*(E)*-2-hydroxy-5-(3-(*m*-tolyl)acryloyl)benzamide (**a7**)

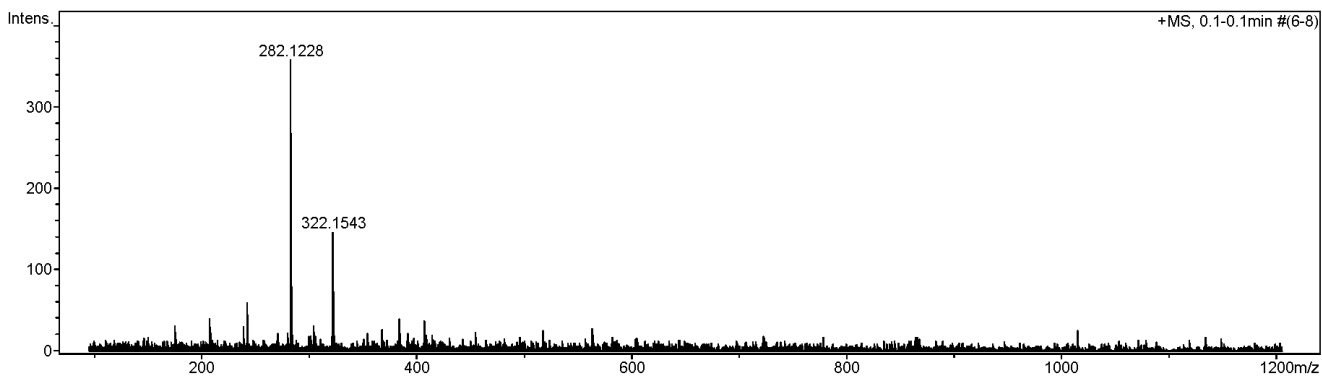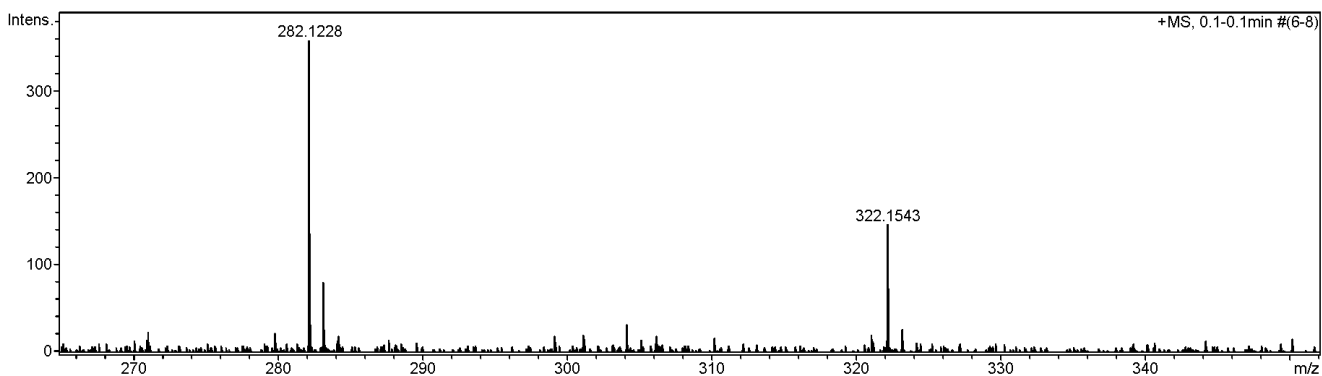

*(E)*-2-hydroxy-5-(3-(*p*-tolyl)acryloyl)benzamide (**a8**)

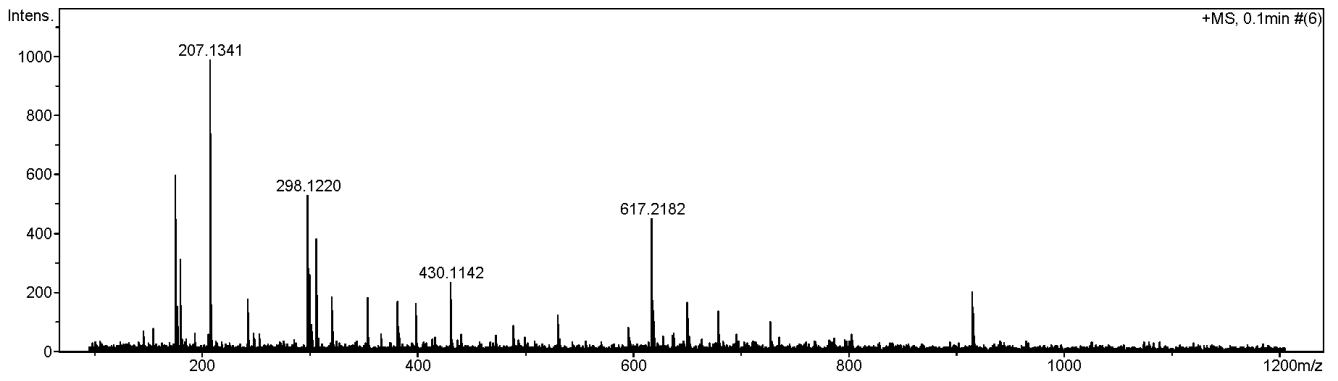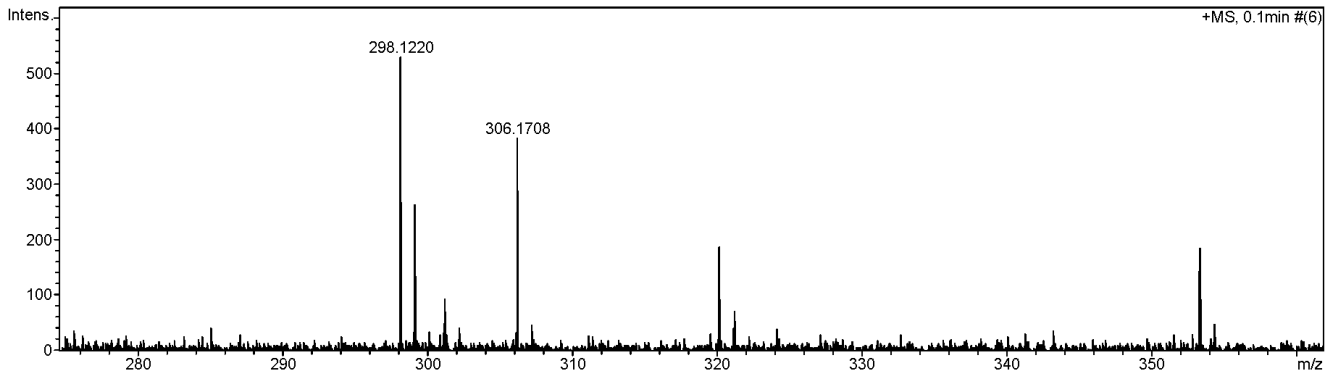

*(E)*-2-hydroxy-5-(3-(2-methoxyphenyl)acryloyl)benzamide (**a9**)

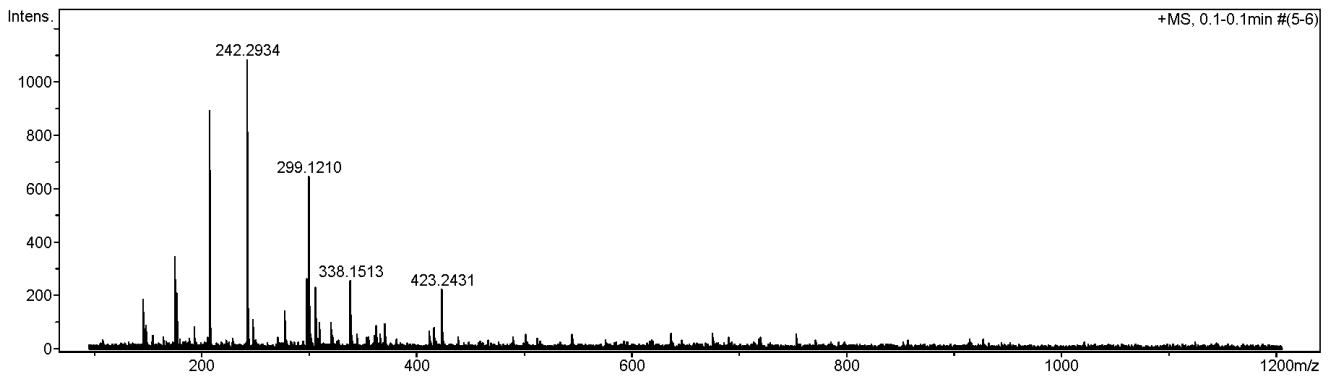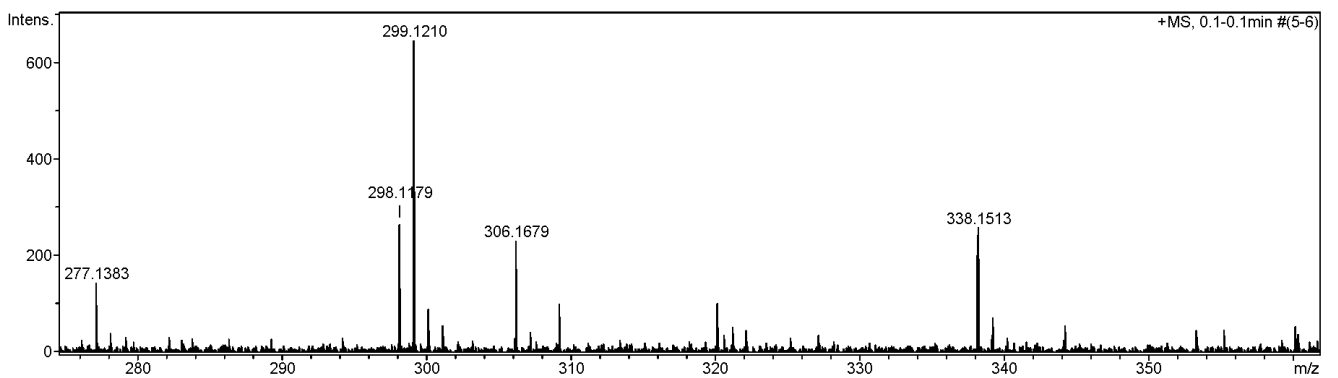

*(E)*-2-hydroxy-5-(3-(3-methoxyphenyl)acryloyl)benzamide (**a10**)

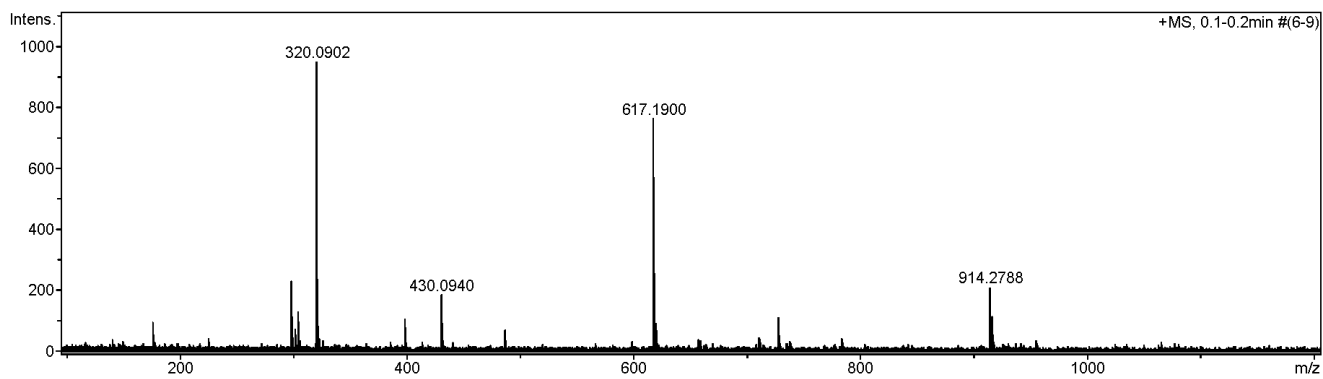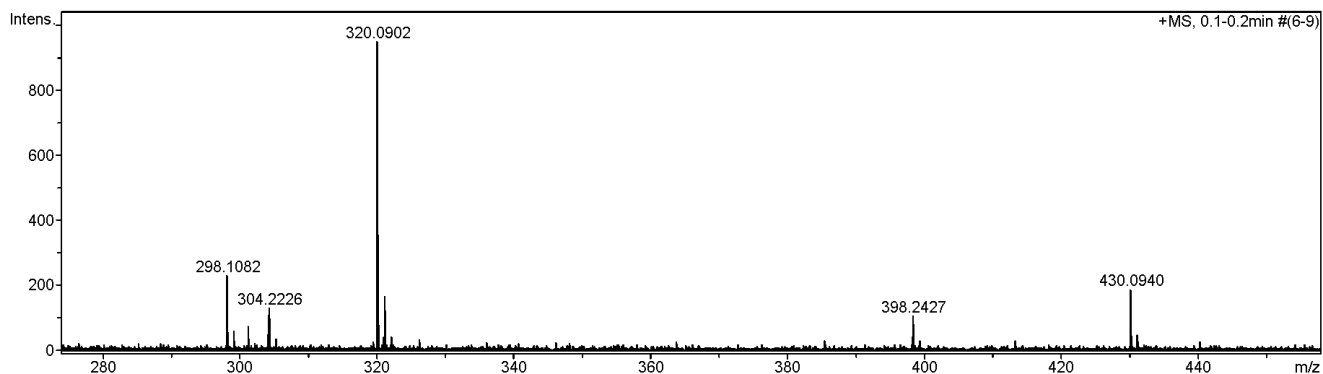

*(E)*-2-hydroxy-5-(3-(4-methoxyphenyl)acryloyl)benzamide (**a11**)

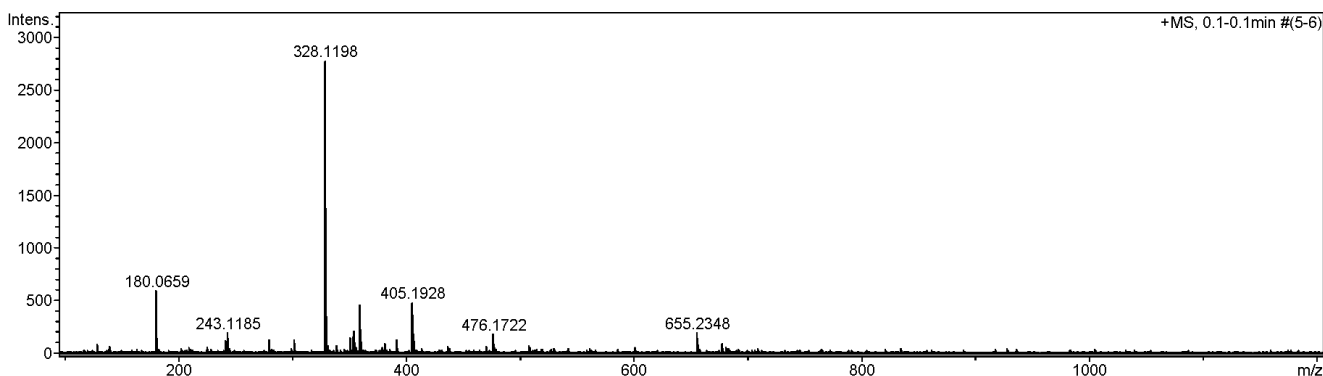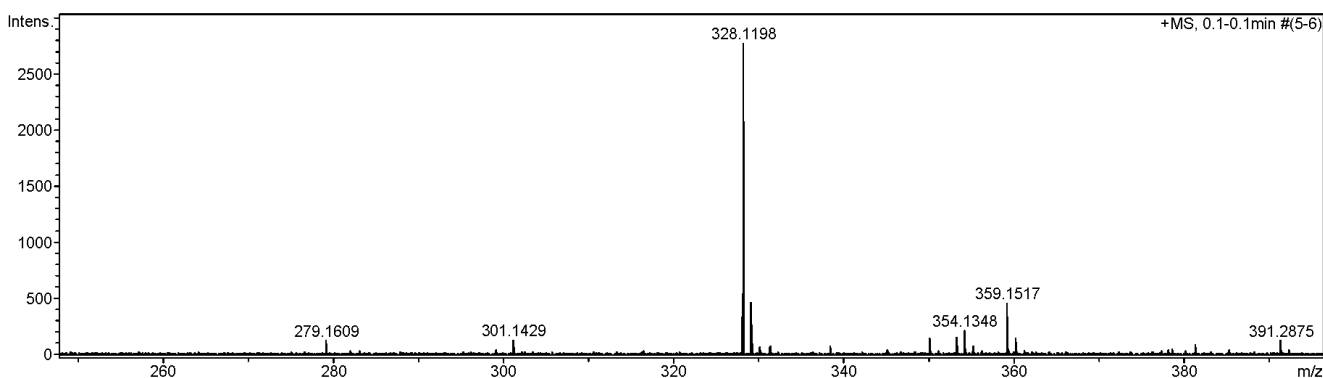

*(E)*-5-(3-(2,4-dimethoxyphenyl)acryloyl)-2-hydroxybenzamide (**a12**)

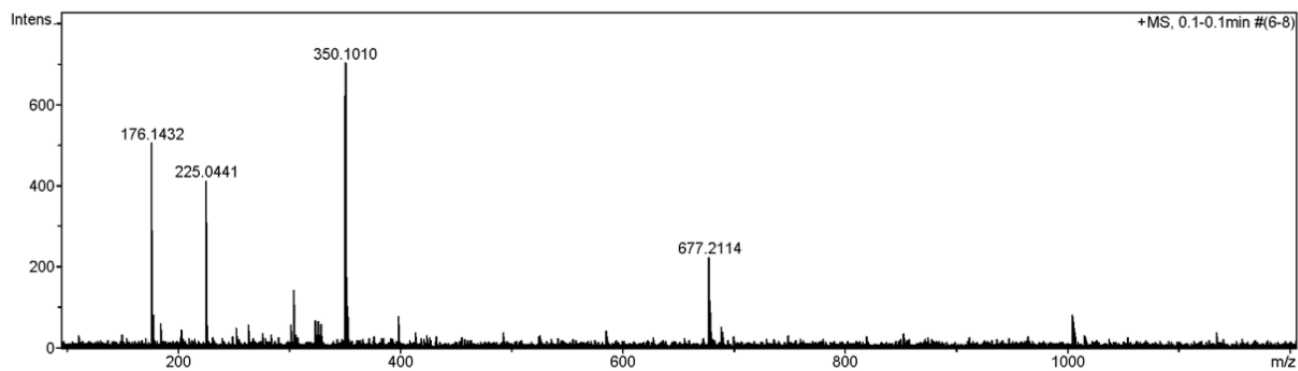

*(E)*-5-(3-(3,4-dimethoxyphenyl)acryloyl)-2-hydroxybenzamide (**a13**)

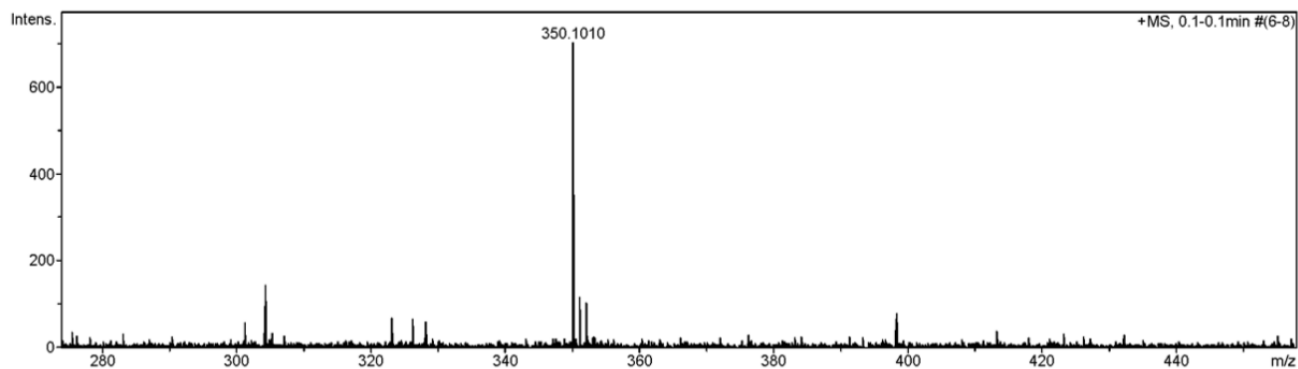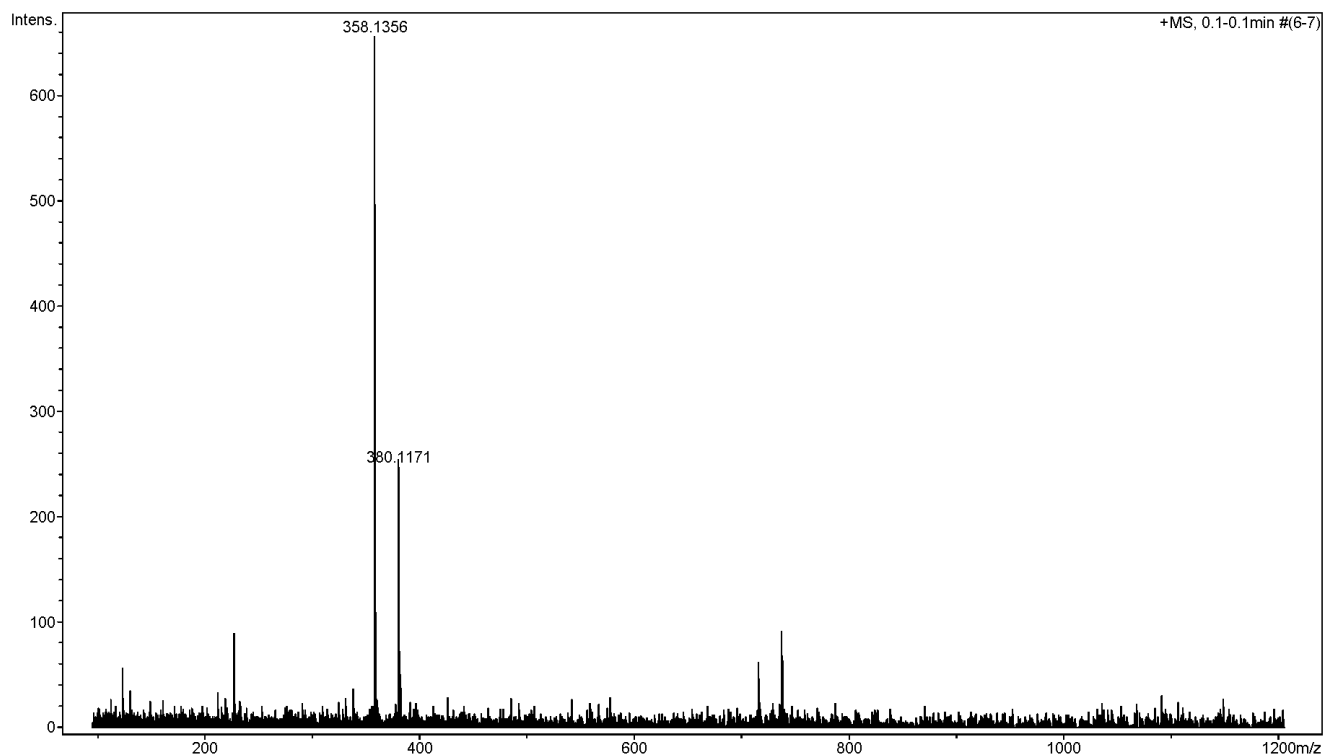

*(F)*-2-hydroxy-5-(3-(3,4,5-trimethoxyphenyl)acryloyl)benzamide (**a14**)



## 5. The purity information information of the synthesized compounds.

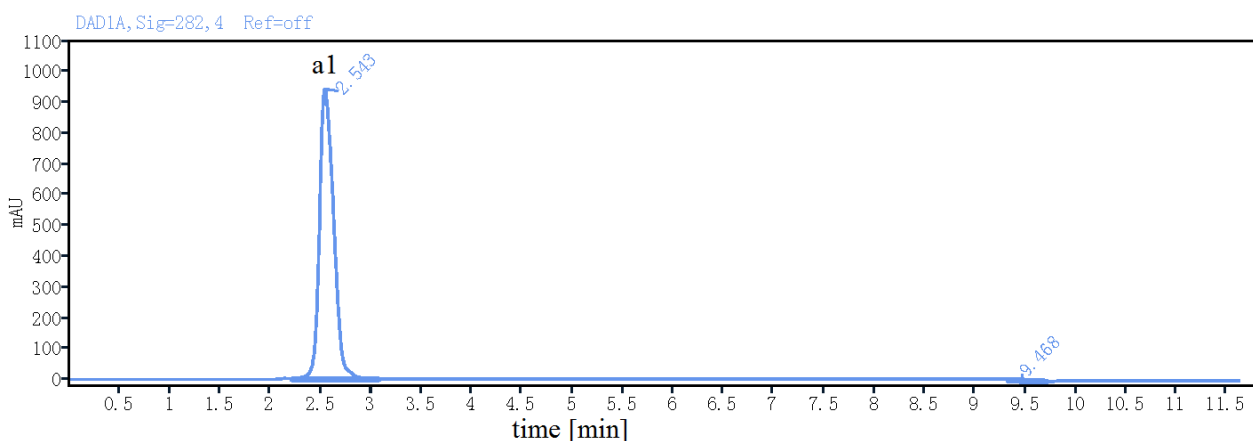

| Retention time[min] | Area    | Height | Area(%) |
|---------------------|---------|--------|---------|
| 2.543               | 9283.22 | 943.09 | 98.97   |
| 9.468               | 96.94   | 5.76   | 1.03    |
|                     | 9380.17 |        |         |

*(F)*-5-(3-(4-fluorophenyl)acryloyl)-2-hydroxybenzamide (**a1**)

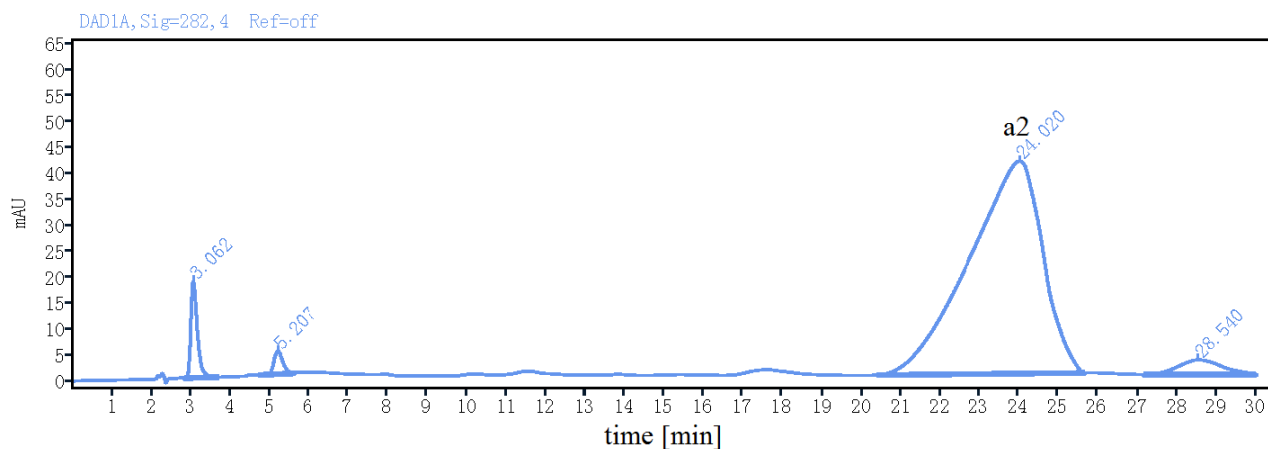

| Retention time[min] | Area    | Height | Area(%) |
|---------------------|---------|--------|---------|
| 3.062               | 212.99  | 18.59  | 3.66    |
| 5.207               | 69.97   | 4.42   | 1.20    |
| 24.020              | 5317.79 | 40.97  | 91.39   |
| 28.540              | 218.31  | 2.84   | 3.75    |
|                     | 5819.05 |        |         |

*(E)*-5-(3-(3-chlorophenyl)acryloyl)-2-hydroxybenzamide (**a2**)

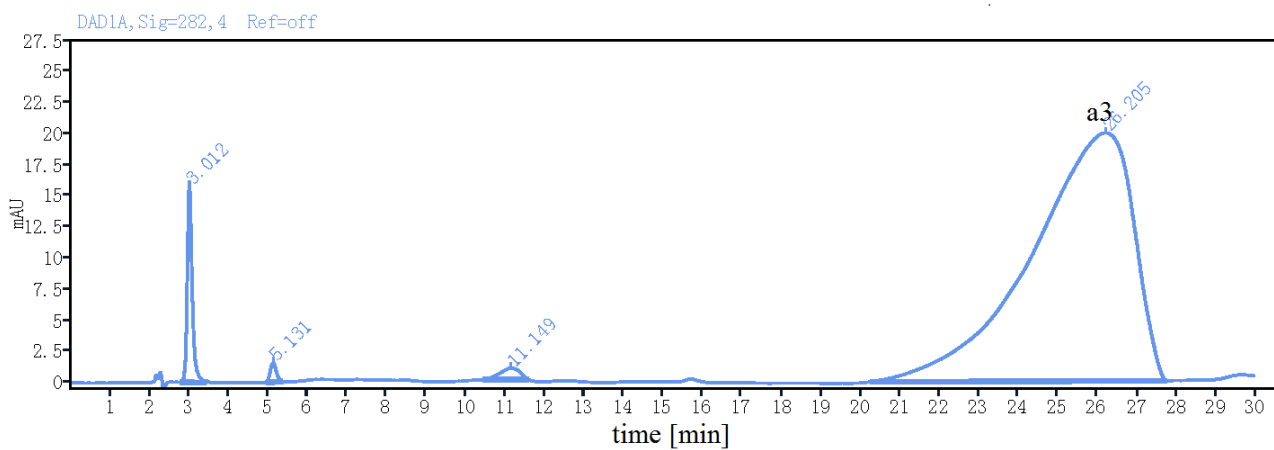

| Retention time[min] | Area    | Height | Area(%) |
|---------------------|---------|--------|---------|
| 3.012               | 136.93  | 15.73  | 3.65    |
| 5.131               | 16.45   | 1.54   | 0.44    |
| 11.149              | 32.42   | 0.93   | 0.86    |
| 26.205              | 3568.92 | 19.94  | 95.05   |
|                     | 3754.72 |        |         |

*(F)*-5-(3-(3-bromophenyl)acryloyl)-2-hydroxybenzamide (**a3**)

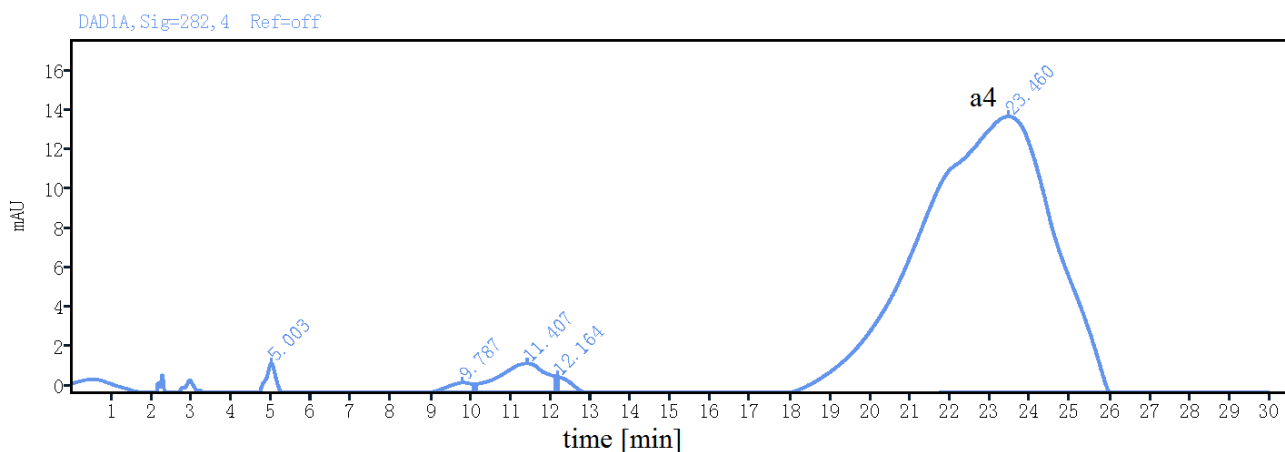

| Retention time[min] | Area    | Height | Area(%) |
|---------------------|---------|--------|---------|
| 5.003               | 30.77   | 1.68   | 0.88    |
| 9.787               | 24.61   | 0.56   | 0.70    |
| 11.407              | 126.81  | 1.51   | 3.63    |
| 12.164              | 20.02   | 0.83   | 0.57    |
| 23.460              | 3295.37 | 14.09  | 94.22   |
|                     | 3497.58 |        |         |

*(E)*-5-(3-(4-bromophenyl)acryloyl)-2-hydroxybenzamide (**a4**)

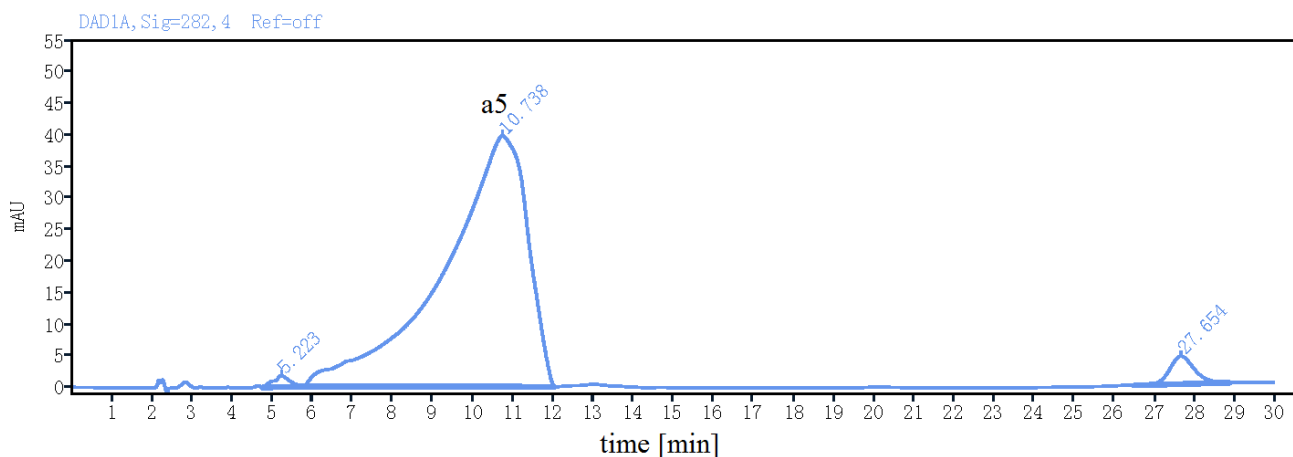

| Retention time[min] | Area    | Height | Area(%) |
|---------------------|---------|--------|---------|
| 5.223               | 50.87   | 1.79   | 0.85    |
| 10.738              | 5744.32 | 39.75  | 95.93   |
| 27.654              | 192.87  | 4.42   | 3.22    |
|                     | 5988.05 |        |         |

*(F)*-5-cinnamoyl-2-hydroxybenzamide (**a5**)

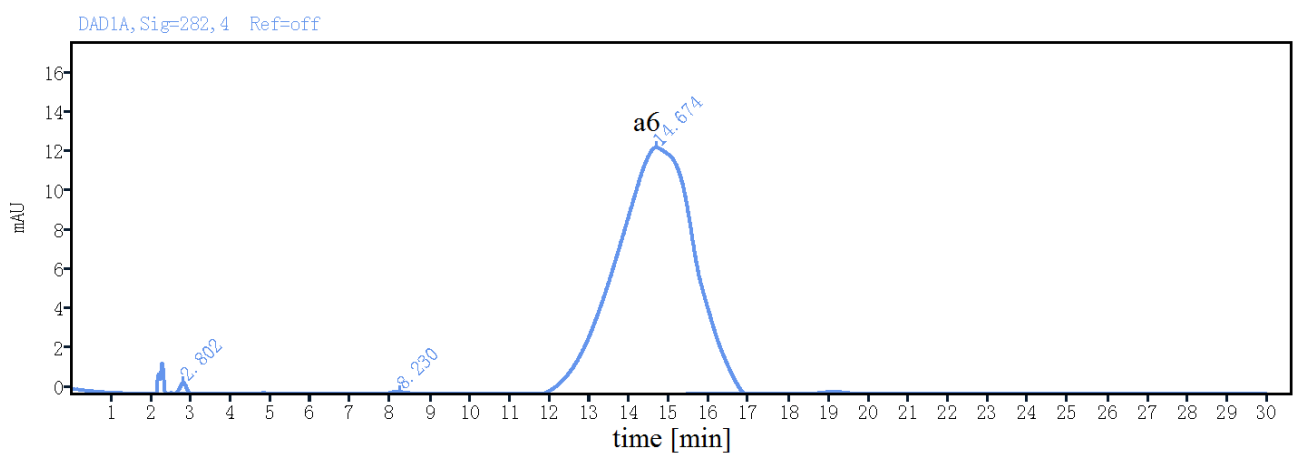

| Retention time[min] | Area    | Height | Area(%) |
|---------------------|---------|--------|---------|
| 2.802               | 7.06    | 0.61   | 0.40    |
| 8.230               | 8.75    | 0.21   | 0.49    |
| 14.674              | 1765.65 | 12.64  | 99.11   |
|                     | 1781.45 |        |         |

*(E)*-2-hydroxy-5-(3-(*o*-tolyl)acryloyl)benzamide (**a6**)

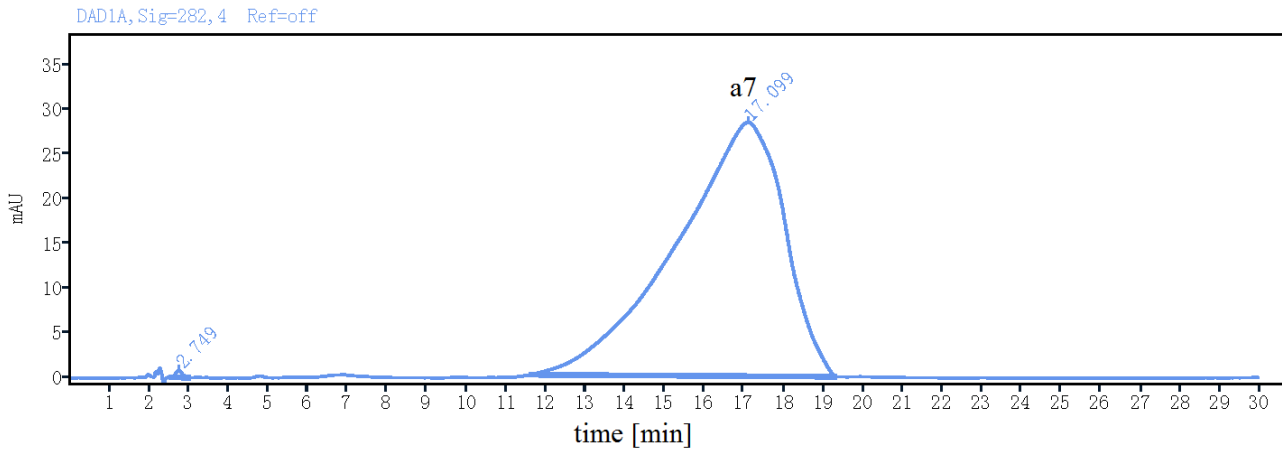

| Retention time[min] | Area    | Height | Area(%) |
|---------------------|---------|--------|---------|
| 2.749               | 9.12    | 0.78   | 0.17    |
| 17.099              | 5384.61 | 28.45  | 99.83   |
|                     | 5393.73 |        |         |

*(E)*-2-hydroxy-5-(3-(*m*-tolyl)acryloyl)benzamide (**a7**)

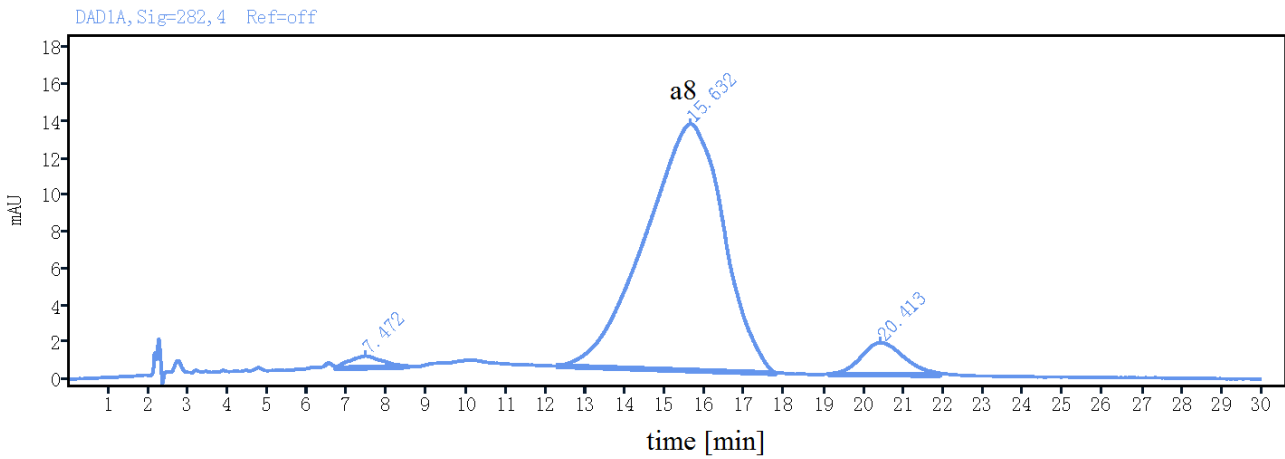

| Retention time[min] | Area    | Height | Area(%) |
|---------------------|---------|--------|---------|
| 7.472               | 36.65   | 0.64   | 1.83    |
| 15.632              | 1834.75 | 13.39  | 91.55   |
| 20.413              | 132.60  | 1.75   | 6.62    |
|                     | 2004.00 |        |         |

*(E)*-2-hydroxy-5-(3-(*p*-tolyl)acryloyl)benzamide (**a8**)

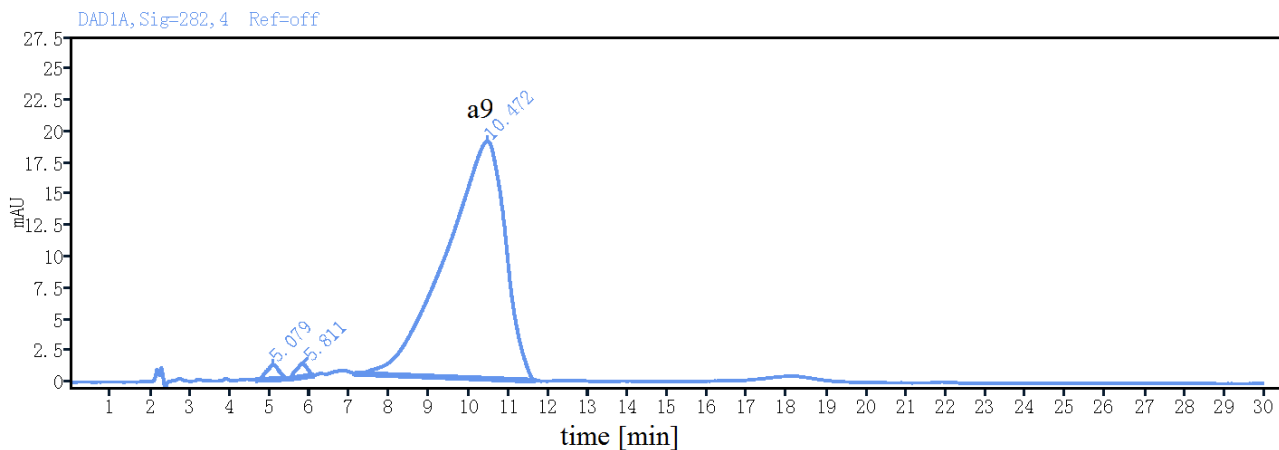

| Retention time[min] | Area    | Height | Area(%) |
|---------------------|---------|--------|---------|
| 5.079               | 25.23   | 1.16   | 1.26    |
| 5.811               | 20.62   | 1.07   | 1.03    |
| 10.472              | 1960.23 | 18.97  | 97.71   |
|                     | 2006.08 |        |         |

*(F)*-2-hydroxy-5-(3-(2-methoxyphenyl)acryloyl)benzamide (**a9**)

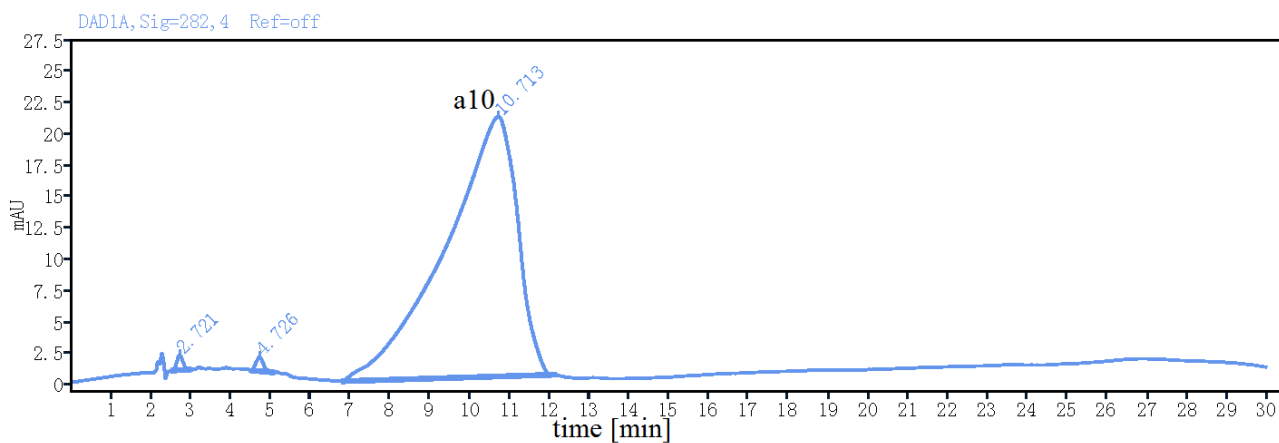

| Retention time[min] | Area    | Height | Area(%) |
|---------------------|---------|--------|---------|
| 2.721               | 12.74   | 1.17   | 0.49    |
| 4.726               | 15.06   | 1.13   | 0.58    |
| 10.713              | 2589.88 | 20.72  | 98.94   |
|                     | 2617.69 |        |         |

*(E)*-2-hydroxy-5-(3-(3-methoxyphenyl)acryloyl)benzamide (**a10**)

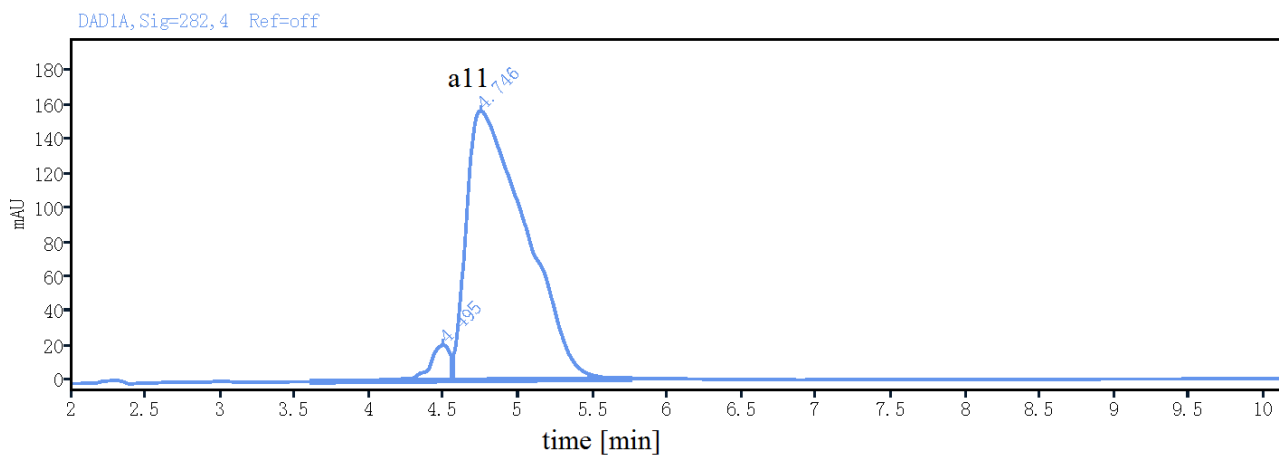

| Retention time[min] | Area    | Height | Area(%) |
|---------------------|---------|--------|---------|
| 4.495               | 205.00  | 20.65  | 4.53    |
| 4.746               | 4323.94 | 156.49 | 95.47   |
|                     | 4528.94 |        |         |

(F)-2-hydroxy-5-(3-(4-methoxyphenyl)acryloyl)benzamide(a11)

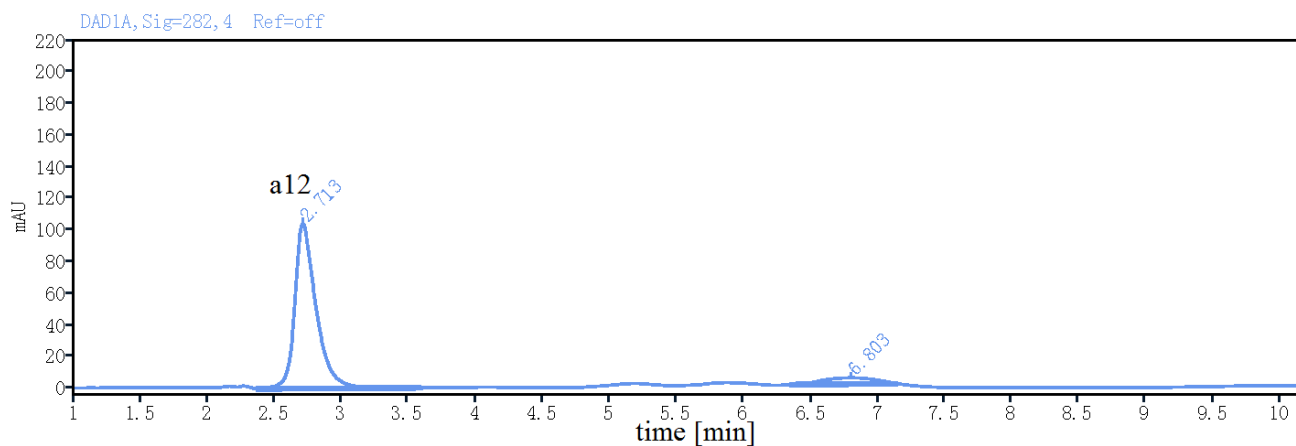

| Retention time[min] | Area    | Height | Area(%) |
|---------------------|---------|--------|---------|
| 2.713               | 1161.95 | 104.17 | 91.27   |
| 6.803               | 111.16  | 4.00   | 8.73    |
|                     | 1273.11 |        |         |

(E)-5-(3-(2,4-dimethoxyphenyl)acryloyl)-2-hydroxybenzamide (a12)

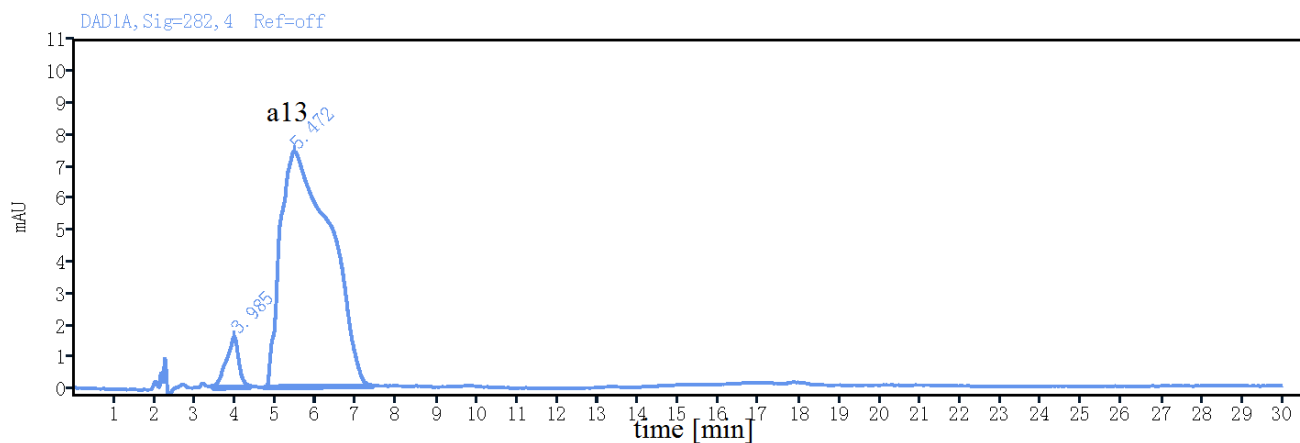

| Retention time[min] | Area   | Height | Area(%) |
|---------------------|--------|--------|---------|
| 3.985               | 34.79  | 1.61   | 5.19    |
| 5.472               | 635.41 | 7.43   | 94.81   |
|                     | 670.19 |        |         |

**(F)** -5-(3-(3,4-dimethoxyphenyl)acryloyl)-2-hydroxybenzamide (**a13**)

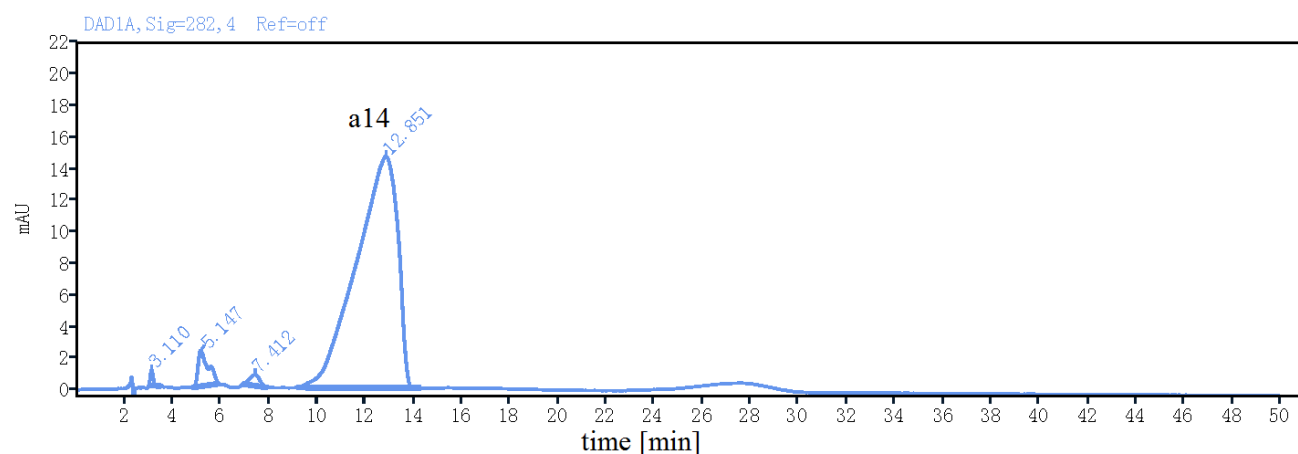

| Retention time[min] | Area    | Height | Area(%) |
|---------------------|---------|--------|---------|
| 3.110               | 6.56    | 0.96   | 0.36    |
| 5.147               | 65.99   | 2.26   | 3.58    |
| 7.412               | 20.02   | 0.70   | 1.09    |
| 12.851              | 1751.58 | 14.67  | 94.98   |
|                     | 1844.15 |        |         |

**(E)**-2-hydroxy-5-(3-(3,4,5-trimethoxyphenyl)acryloyl)benzamide (**a14**)
